# Supplementary material for: Scalarane-Type Sesterterpenoids from the Marine Sponge Lendenfeldia sp. Alleviate Inflammation in Human Neutrophils
Source: MDPI journal article supplement (doi:10.3390/md19100561), 2021-09-30
Supplement: s1 [file s1]

## Supplementary Materials

### Scalarane-type sesterterpenoids from the marine sponge *Lendenfeldia* sp. alleviate inflammation in human neutrophils

Bo-Rong Peng <sup>1,2,†</sup>, Kuei-Hung Lai <sup>3,4,5,†</sup>, Gene-Hsiang Lee <sup>6</sup>, Steve Sheng-Fa Yu <sup>7</sup>, Chang-Yih Duh <sup>8</sup>, Jui-Hsin Su <sup>2,8</sup>, Li-Guo Zheng <sup>2</sup>, Tsong-Long Hwang <sup>9,10,11,12,\*</sup>, Ping-Jyun Sung <sup>2,8,13,14,15,\*\*</sup>

<sup>1</sup> Doctoral Degree Program in Marine Biotechnology, National Sun Yat-sen University, Kaohsiung, 804201, Taiwan;

<sup>2</sup> National Museum of Marine Biology & Aquarium, Pingtung 944401, Taiwan

<sup>3</sup> PhD Program in Clinical Drug Development of Herbal Medicine, College of Pharmacy, Taipei Medical University, Taipei 110301, Taiwan

<sup>4</sup> Graduate Institute of Pharmacognosy, College of Pharmacy, Taipei Medical University, Taipei 110301, Taiwan

<sup>5</sup> Traditional Herbal Medicine Research Center, Taipei Medical University Hospital, Taipei 110301, Taiwan

<sup>6</sup> Instrumentation Center, National Taiwan University, Taipei 106319, Taiwan; ghlee@ntu.edu.tw

<sup>7</sup> Institute of Chemistry, Academia Sinica, Taipei 115201, Taiwan; sfyu@chem.sinica.edu.tw

<sup>8</sup> Department of Marine Biotechnology and Resources, National Sun Yat-sen University, Kaohsiung 804201, Taiwan;

<sup>9</sup> Research Center for Chinese Herbal Medicine; Graduate Institute of Health Industry Technology, College of Human Ecology, Chang Gung University of Science and Technology, Taoyuan 333324, Taiwan

<sup>10</sup> Department of Anaesthesiology, Chang Gung Memorial Hospital, Taoyuan 333423, Taiwan

<sup>11</sup> Graduate Institute of Natural Products, College of Medicine, Chang Gung University, Taoyuan 333323, Taiwan

<sup>12</sup> Department of Chemical Engineering, Ming Chi University of Technology, New Taipei City 243303, Taiwan

<sup>13</sup> Chinese Medicine Research and Development Center, China Medical University Hospital, Taichung 404394, Taiwan

<sup>14</sup> Graduate Institute of Natural Products, Kaohsiung Medical University, Kaohsiung 807378, Taiwan

<sup>15</sup> PhD Program in Pharmaceutical Biotechnology, Fu Jen Catholic University, New Taipei 242062, Taiwan

<sup>†</sup> These authors contributed equally to this work

<sup>\*</sup> Correspondence: htl@mail.cgu.edu.tw (T.-L.H.); pjsung@nmmba.gov.tw (P.-J.S.); Tel: +886-3-211-8800 (ext. 5523) (T.-L.H.); +886-8-882-5037 (P.-J.S.)

## Table of Contents

|                                                                                                            |    |
|------------------------------------------------------------------------------------------------------------|----|
| <b>Figure S1.</b> IR spectrum of compound <b>1</b> .....                                                   | 6  |
| <b>Figure S2.</b> ESIMS spectrum of compound <b>1</b> .....                                                | 6  |
| <b>Figure S3.</b> HRESIMS spectrum of compound <b>1</b> .....                                              | 7  |
| <b>Figure S4.</b> $^1\text{H}$ NMR spectrum (600 MHz) of compound <b>1</b> in $\text{CDCl}_3$ .....        | 7  |
| <b>Figure S5.</b> $^{13}\text{C}$ NMR spectrum (150 MHz) of compound <b>1</b> in $\text{CDCl}_3$ .....     | 8  |
| <b>Figure S6.</b> HSQC spectrum of compound <b>1</b> in $\text{CDCl}_3$ .....                              | 8  |
| <b>Figure S7.</b> HMBC spectrum of compound <b>1</b> in $\text{CDCl}_3$ .....                              | 9  |
| <b>Figure S8.</b> $^1\text{H}$ - $^1\text{H}$ COSY spectrum of compound <b>1</b> in $\text{CDCl}_3$ .....  | 9  |
| <b>Figure S9.</b> NOESY spectrum of compound <b>1</b> in $\text{CDCl}_3$ .....                             | 10 |
| <b>Figure S10.</b> IR spectrum of compound <b>2</b> .....                                                  | 10 |
| <b>Figure S11.</b> ESIMS spectrum of compound <b>2</b> .....                                               | 11 |
| <b>Figure S12.</b> HRESIMS spectrum of compound <b>2</b> .....                                             | 11 |
| <b>Figure S13.</b> $^1\text{H}$ NMR spectrum (400 MHz) of compound <b>2</b> in $\text{CDCl}_3$ .....       | 12 |
| <b>Figure S14.</b> $^{13}\text{C}$ NMR spectrum (100 MHz) of compound <b>2</b> in $\text{CDCl}_3$ .....    | 12 |
| <b>Figure S15.</b> DEPT spectrum of compound <b>2</b> in $\text{CDCl}_3$ .....                             | 13 |
| <b>Figure S16.</b> HSQC spectrum of compound <b>2</b> in $\text{CDCl}_3$ .....                             | 13 |
| <b>Figure S17.</b> HMBC spectrum of compound <b>2</b> in $\text{CDCl}_3$ .....                             | 14 |
| <b>Figure S18.</b> $^1\text{H}$ - $^1\text{H}$ COSY spectrum of compound <b>2</b> in $\text{CDCl}_3$ ..... | 14 |
| <b>Figure S19.</b> NOESY spectrum of compound <b>2</b> in $\text{CDCl}_3$ .....                            | 15 |

|                                                                                                             |    |
|-------------------------------------------------------------------------------------------------------------|----|
| <b>Figure S20.</b> IR spectrum of compound <b>3</b> .....                                                   | 15 |
| <b>Figure S21.</b> ESIMS spectrum of compound <b>3</b> .....                                                | 16 |
| <b>Figure S22.</b> HRESIMS spectrum of compound <b>3</b> .....                                              | 16 |
| <b>Figure S23.</b> $^1\text{H}$ NMR spectrum (400 MHz) of compound <b>3</b> in $\text{CDCl}_3$ . ....       | 17 |
| <b>Figure S24.</b> $^{13}\text{C}$ NMR spectrum (100 MHz) of compound <b>3</b> in $\text{CDCl}_3$ .....     | 17 |
| <b>Figure S25.</b> DEPT spectrum of compound <b>3</b> in $\text{CDCl}_3$ .....                              | 18 |
| <b>Figure S26.</b> HSQC spectrum of compound <b>3</b> in $\text{CDCl}_3$ .....                              | 18 |
| <b>Figure S27.</b> HMBC spectrum of compound <b>3</b> in $\text{CDCl}_3$ .....                              | 19 |
| <b>Figure S28.</b> $^1\text{H}$ - $^1\text{H}$ COSY spectrum of compound <b>3</b> in $\text{CDCl}_3$ . .... | 19 |
| <b>Figure S29.</b> NOESY spectrum of compound <b>3</b> in $\text{CDCl}_3$ .....                             | 20 |
| <b>Figure S30.</b> IR spectrum of compound <b>4</b> .....                                                   | 20 |
| <b>Figure S31.</b> ESIMS spectrum of compound <b>4</b> .....                                                | 21 |
| <b>Figure S32.</b> HRESIMS spectrum of compound <b>4</b> .....                                              | 21 |
| <b>Figure S33.</b> $^1\text{H}$ NMR spectrum (400 MHz) of compound <b>4</b> in $\text{CDCl}_3$ . ....       | 22 |
| <b>Figure S34.</b> $^{13}\text{C}$ NMR spectrum (100 MHz) of compound <b>4</b> in $\text{CDCl}_3$ .....     | 22 |
| <b>Figure S35.</b> HSQC spectrum of compound <b>4</b> in $\text{CDCl}_3$ .....                              | 23 |
| <b>Figure S36.</b> HMBC spectrum of compound <b>4</b> in $\text{CDCl}_3$ .....                              | 23 |
| <b>Figure S37.</b> $^1\text{H}$ - $^1\text{H}$ COSY spectrum of compound <b>4</b> in $\text{CDCl}_3$ . .... | 24 |
| <b>Figure S38.</b> NOESY spectrum of compound <b>4</b> in $\text{CDCl}_3$ .....                             | 24 |
| <b>Figure S39.</b> IR spectrum of compound <b>5</b> .....                                                   | 25 |
| <b>Figure S40.</b> ESIMS spectrum of compound <b>5</b> .....                                                | 25 |

|                                                                                                             |    |
|-------------------------------------------------------------------------------------------------------------|----|
| <b>Figure S41.</b> HRESIMS spectrum of compound <b>5</b> .....                                              | 26 |
| <b>Figure S42.</b> $^1\text{H}$ NMR spectrum (600 MHz) of compound <b>5</b> in $\text{CDCl}_3$ . ....       | 26 |
| <b>Figure S43.</b> $^{13}\text{C}$ NMR spectrum (150 MHz) of compound <b>5</b> in $\text{CDCl}_3$ .....     | 27 |
| <b>Figure S44.</b> HSQC spectrum of compound <b>5</b> in $\text{CDCl}_3$ .....                              | 27 |
| <b>Figure S45.</b> HMBC spectrum of compound <b>5</b> in $\text{CDCl}_3$ .....                              | 28 |
| <b>Figure S46.</b> $^1\text{H}$ - $^1\text{H}$ COSY spectrum of compound <b>5</b> in $\text{CDCl}_3$ . .... | 28 |
| <b>Figure S47.</b> NOESY spectrum of compound <b>5</b> in $\text{CDCl}_3$ .....                             | 29 |
| <b>Figure S48.</b> IR spectrum of compound <b>6</b> .....                                                   | 29 |
| <b>Figure S49.</b> ESIMS spectrum of compound <b>6</b> .....                                                | 30 |
| <b>Figure S50.</b> HRESIMS spectrum of compound <b>6</b> .....                                              | 30 |
| <b>Figure S51.</b> $^1\text{H}$ NMR spectrum (600 MHz) of compound <b>6</b> in $\text{CDCl}_3$ . ....       | 31 |
| <b>Figure S52.</b> $^{13}\text{C}$ NMR spectrum (150 MHz) of compound <b>6</b> in $\text{CDCl}_3$ .....     | 31 |
| <b>Figure S53.</b> HSQC spectrum of compound <b>6</b> in $\text{CDCl}_3$ .....                              | 32 |
| <b>Figure S54.</b> HMBC spectrum of compound <b>6</b> in $\text{CDCl}_3$ .....                              | 32 |
| <b>Figure S55.</b> $^1\text{H}$ - $^1\text{H}$ COSY spectrum of compound <b>6</b> in $\text{CDCl}_3$ . .... | 33 |
| <b>Figure S56.</b> NOESY spectrum of compound <b>6</b> in $\text{CDCl}_3$ .....                             | 33 |
| <b>Figure S57.</b> IR spectrum of compound <b>7</b> .....                                                   | 34 |
| <b>Figure S58.</b> ESIMS spectrum of compound <b>7</b> .....                                                | 34 |
| <b>Figure S59.</b> HRESIMS spectrum of compound <b>7</b> .....                                              | 35 |
| <b>Figure S60.</b> $^1\text{H}$ NMR spectrum (400 MHz) of compound <b>7</b> in $\text{CDCl}_3$ . ....       | 35 |
| <b>Figure S61.</b> $^{13}\text{C}$ NMR spectrum (100 MHz) of compound <b>7</b> in $\text{CDCl}_3$ .....     | 36 |



|                                                                                                                 |    |
|-----------------------------------------------------------------------------------------------------------------|----|
| <b>Figure S62.</b> DEPT spectrum of compound <b>7</b> in CDCl <sub>3</sub> .....                                | 36 |
| <b>Figure S63.</b> HSQC spectrum of compound <b>7</b> in CDCl <sub>3</sub> .....                                | 37 |
| <b>Figure S64.</b> HMBC spectrum of compound <b>7</b> in CDCl <sub>3</sub> .....                                | 37 |
| <b>Figure S65.</b> <sup>1</sup> H- <sup>1</sup> H COSY spectrum of compound <b>7</b> in CDCl <sub>3</sub> ..... | 38 |
| <b>Figure S66.</b> NOESY spectrum of compound <b>7</b> in CDCl <sub>3</sub> .....                               | 38 |

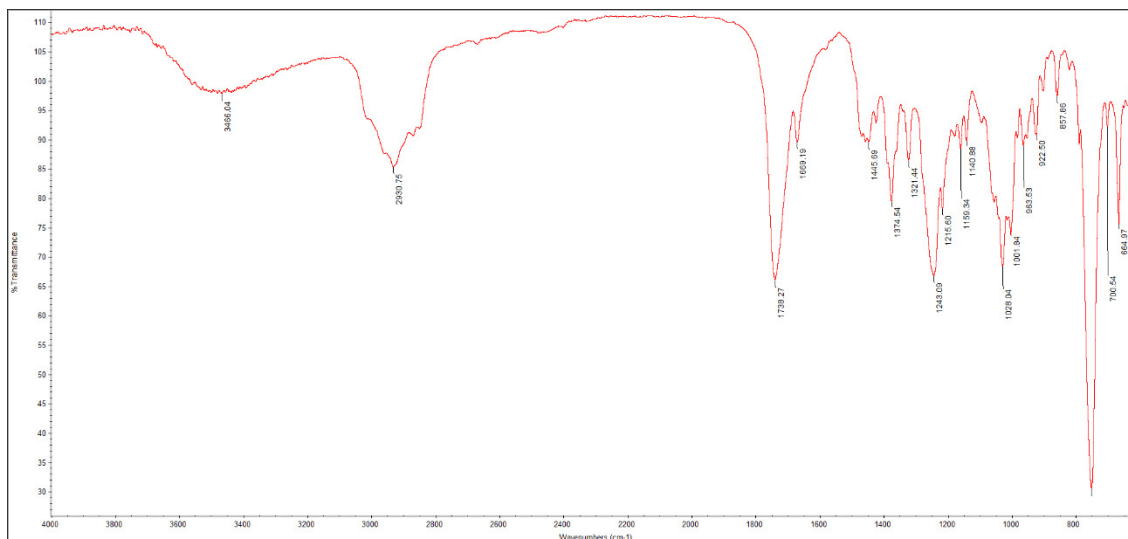

Figure S1. IR spectrum of compound 1.

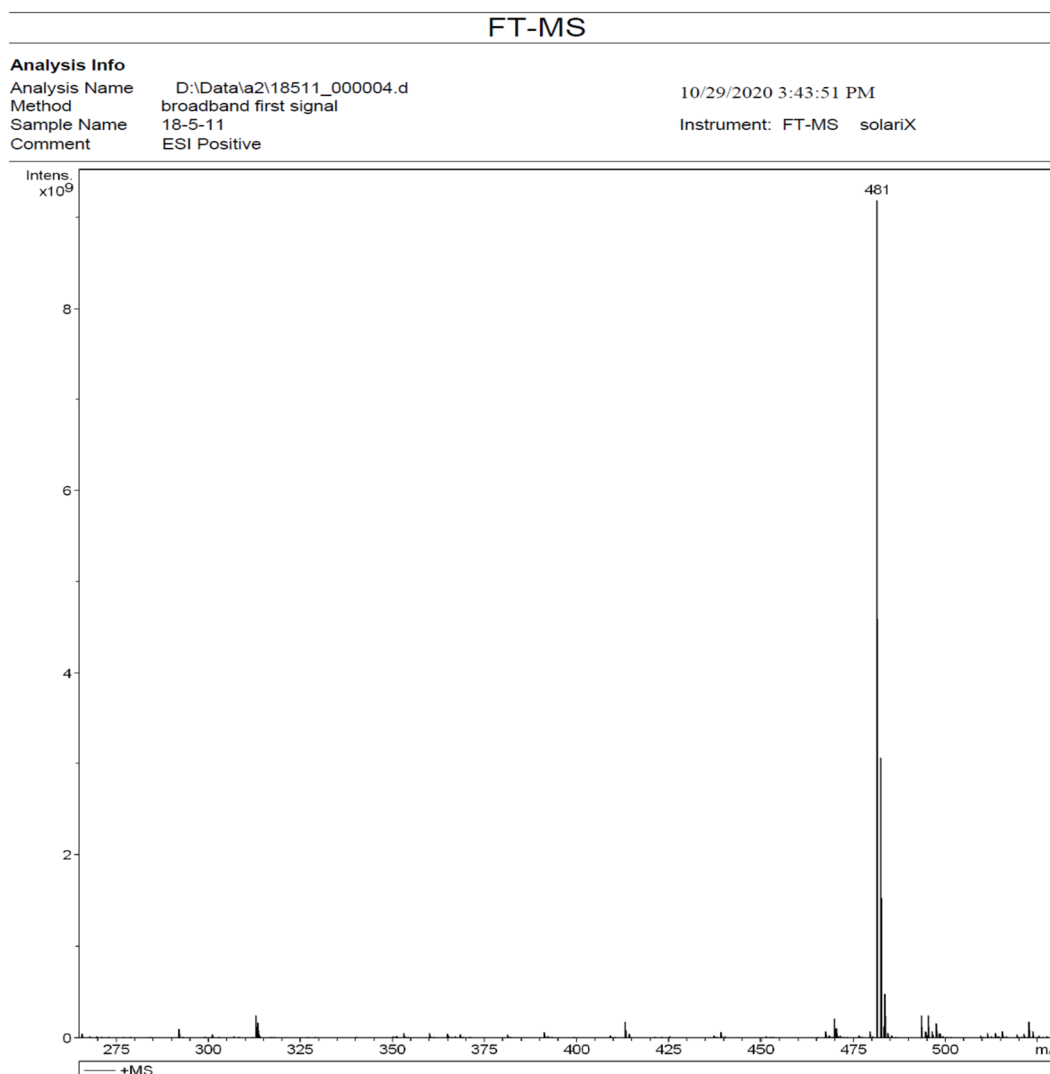

Figure S2. ESIMS spectrum of compound 1.

## Mass Spectrum SmartFormula Report

### Analysis Info

Analysis Name D:\Data\2\18511\_000003.d  
 Method broadband first signal  
 Sample Name 18-5-11  
 Comment ESI Positive

10/29/2020 3:42:39 PM  
 Operator: YU HSIAO-CHING  
 Instrument: BRUKER FT-MS solariX

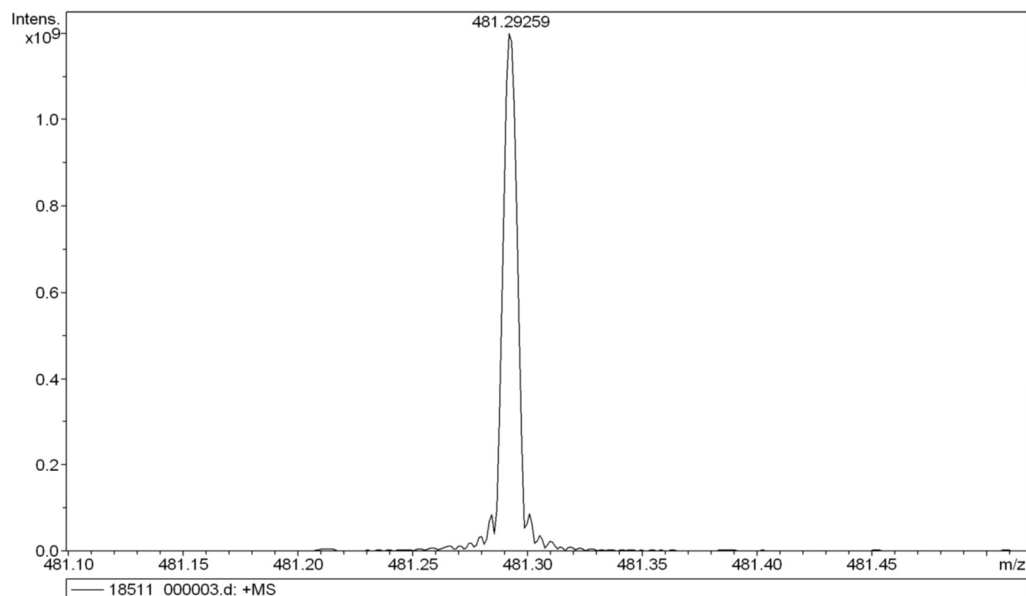

| Meas. m/z | # | Formula                                          | Score  | m/z       | err [mDa] | err [ppm] | mSigma | rdb | e <sup>-</sup> | Conf | N-Rule |
|-----------|---|--------------------------------------------------|--------|-----------|-----------|-----------|--------|-----|----------------|------|--------|
| 481.29259 | 1 | C <sub>28</sub> H <sub>42</sub> NaO <sub>5</sub> | 100.00 | 481.29245 | -0.14     | -0.30     | 21.5   | 7.5 | even           |      | ok     |

**Figure S3.** HRESIMS spectrum of compound **1**.

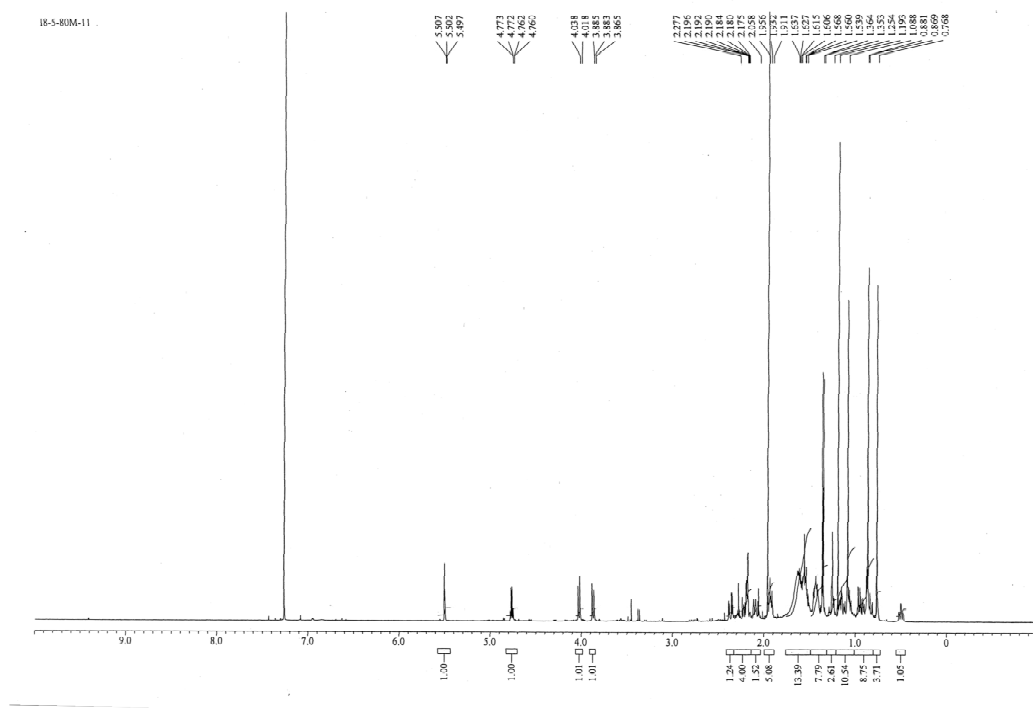

**Figure S4.** <sup>1</sup>H NMR spectrum (600 MHz) of compound **1** in CDCl<sub>3</sub>.

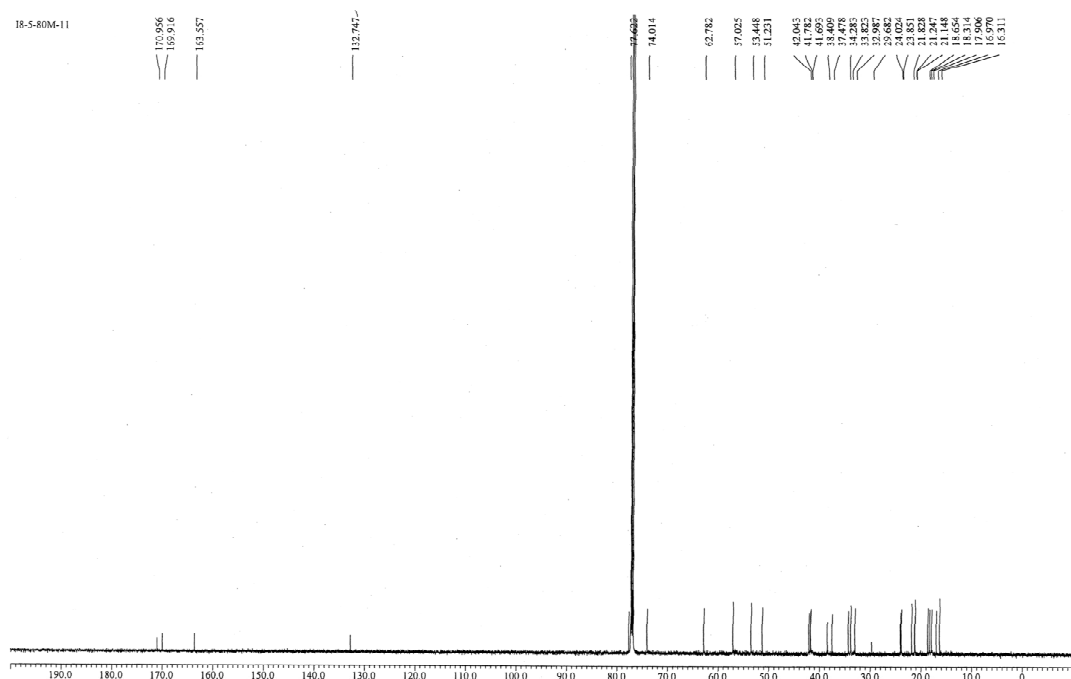

**Figure S5.**  $^{13}\text{C}$  NMR spectrum (150 MHz) of compound **1** in  $\text{CDCl}_3$ .

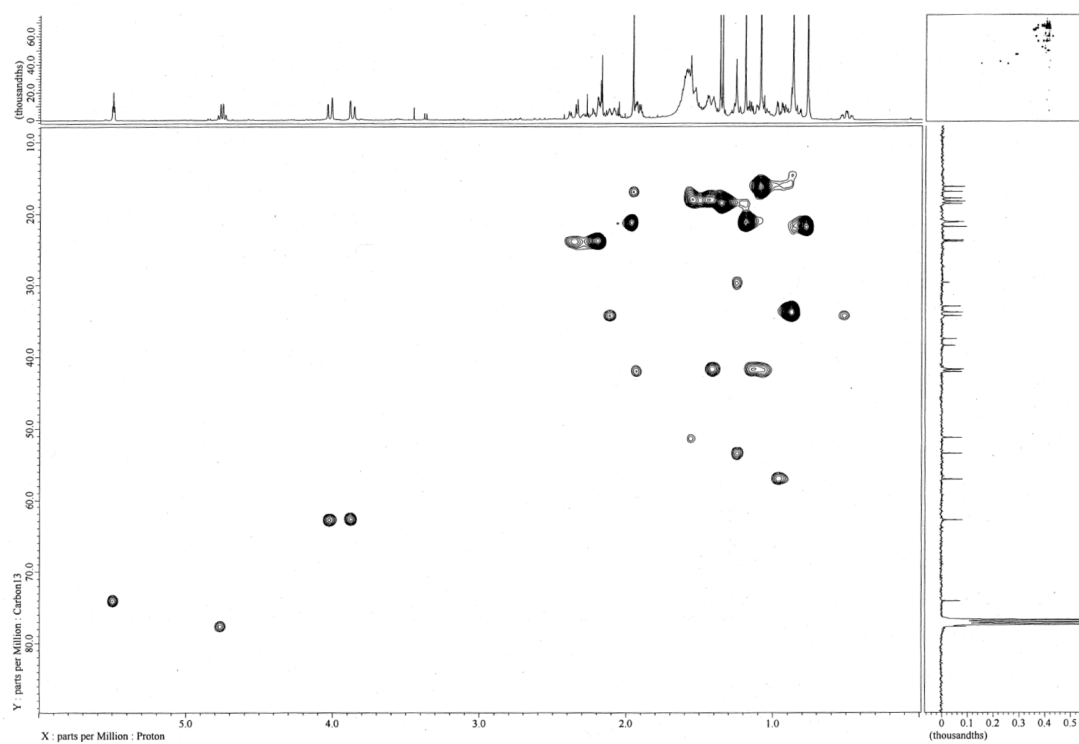

**Figure S6.** HSQC spectrum of compound **1** in  $\text{CDCl}_3$ .

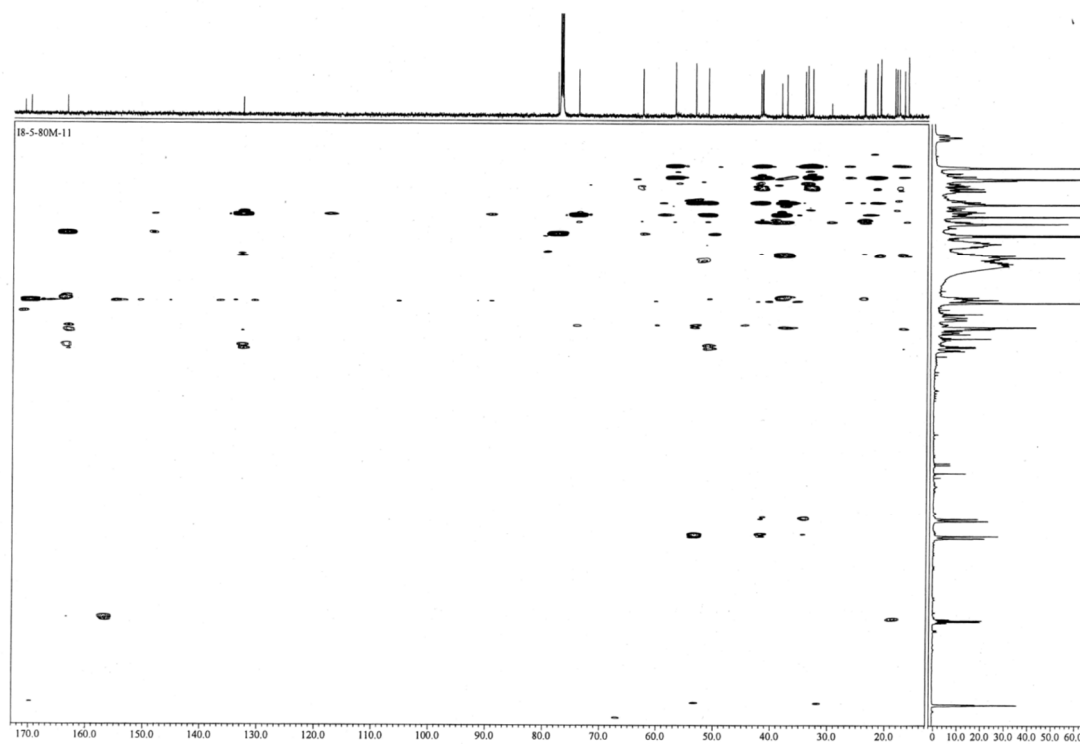

**Figure S7.** HMBC spectrum of compound **1** in CDCl<sub>3</sub>.

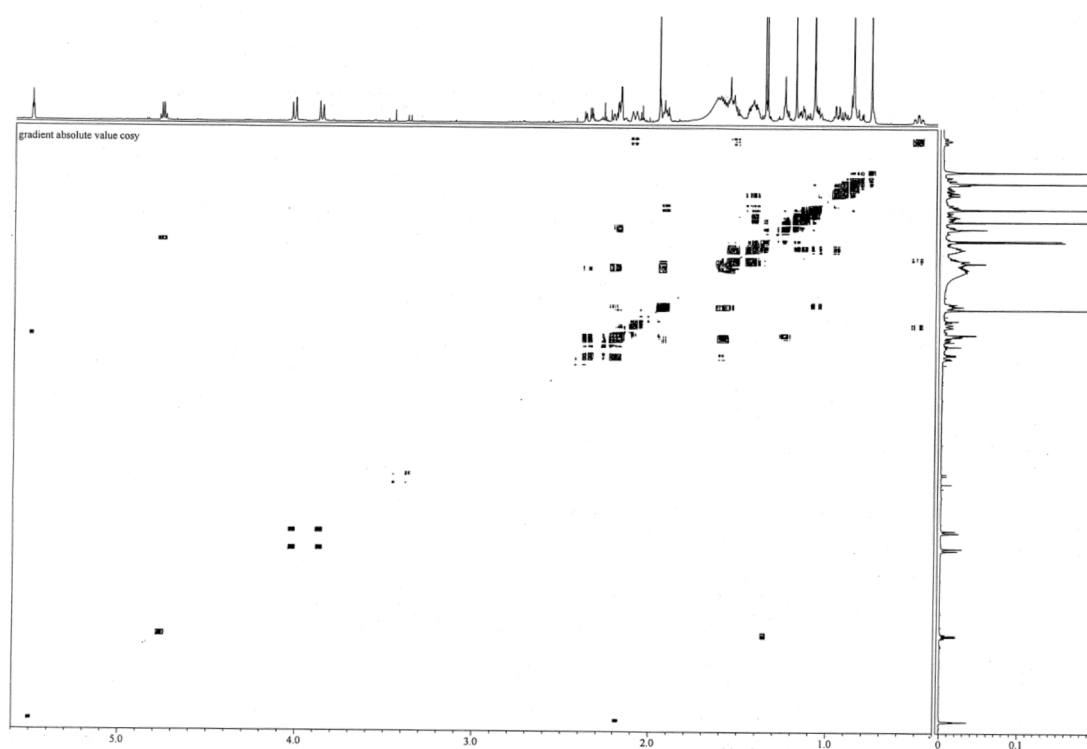

**Figure S8.** <sup>1</sup>H-<sup>1</sup>H COSY spectrum of compound **1** in CDCl<sub>3</sub>.

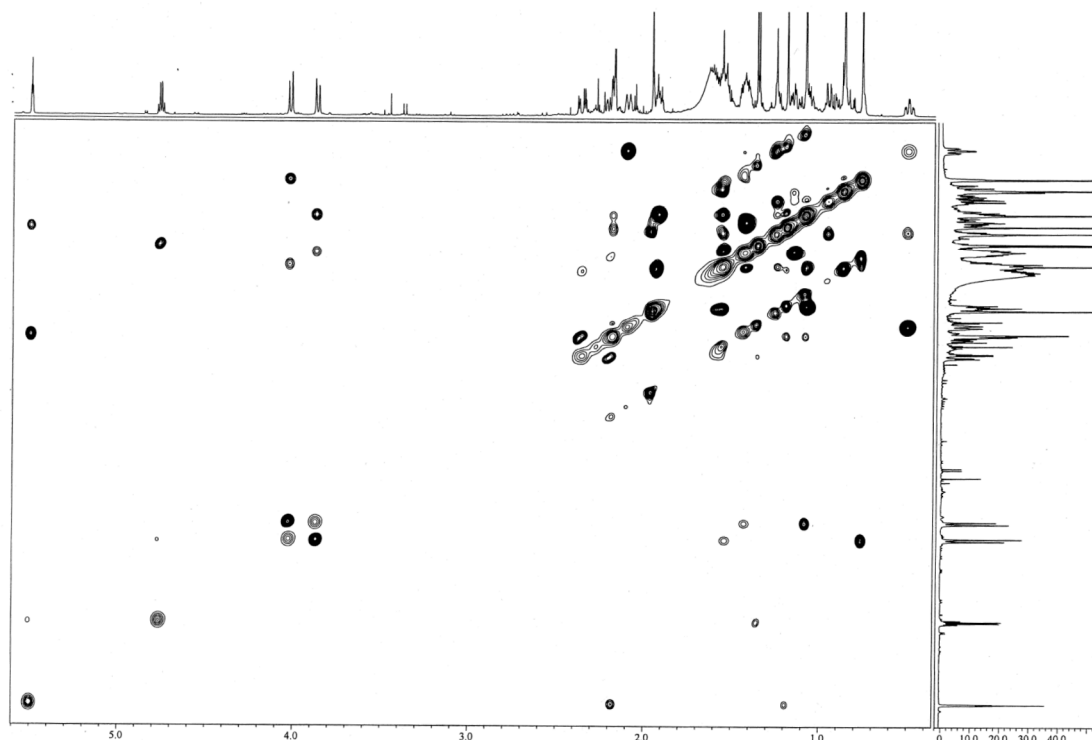

**Figure S9.** NOESY spectrum of compound **1** in CDCl<sub>3</sub>

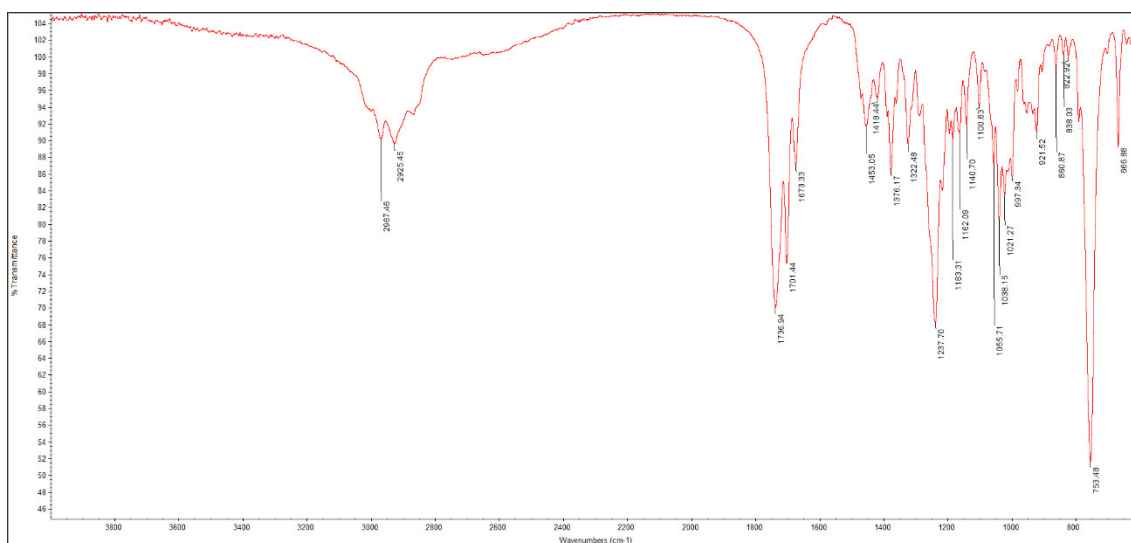

**Figure S10.** IR spectrum of compound **2**.

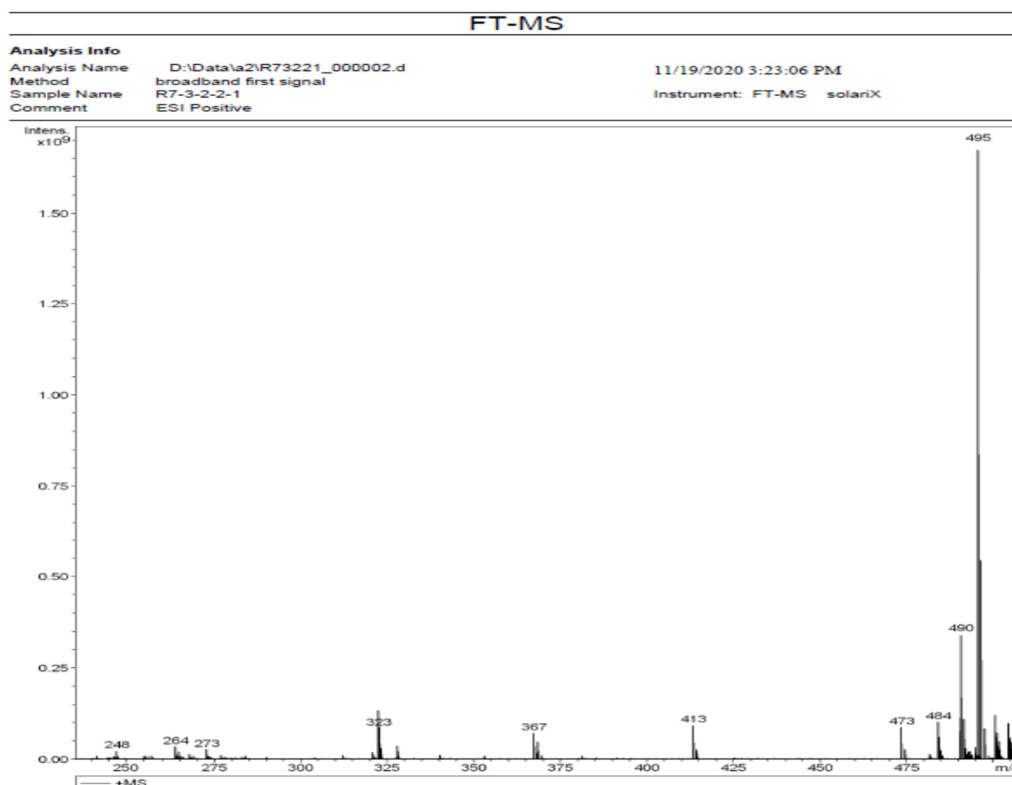

**Figure S11.** ESIMS spectrum of compound 2.

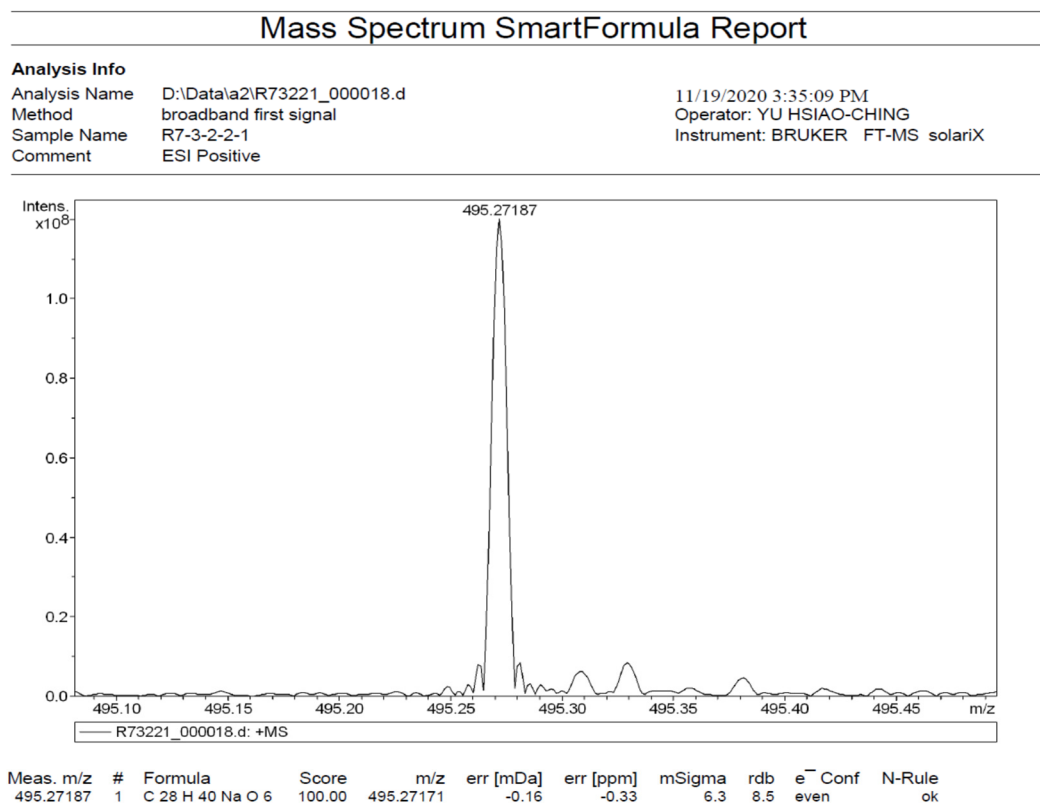

**Figure S12.** HRESIMS spectrum of compound 2.

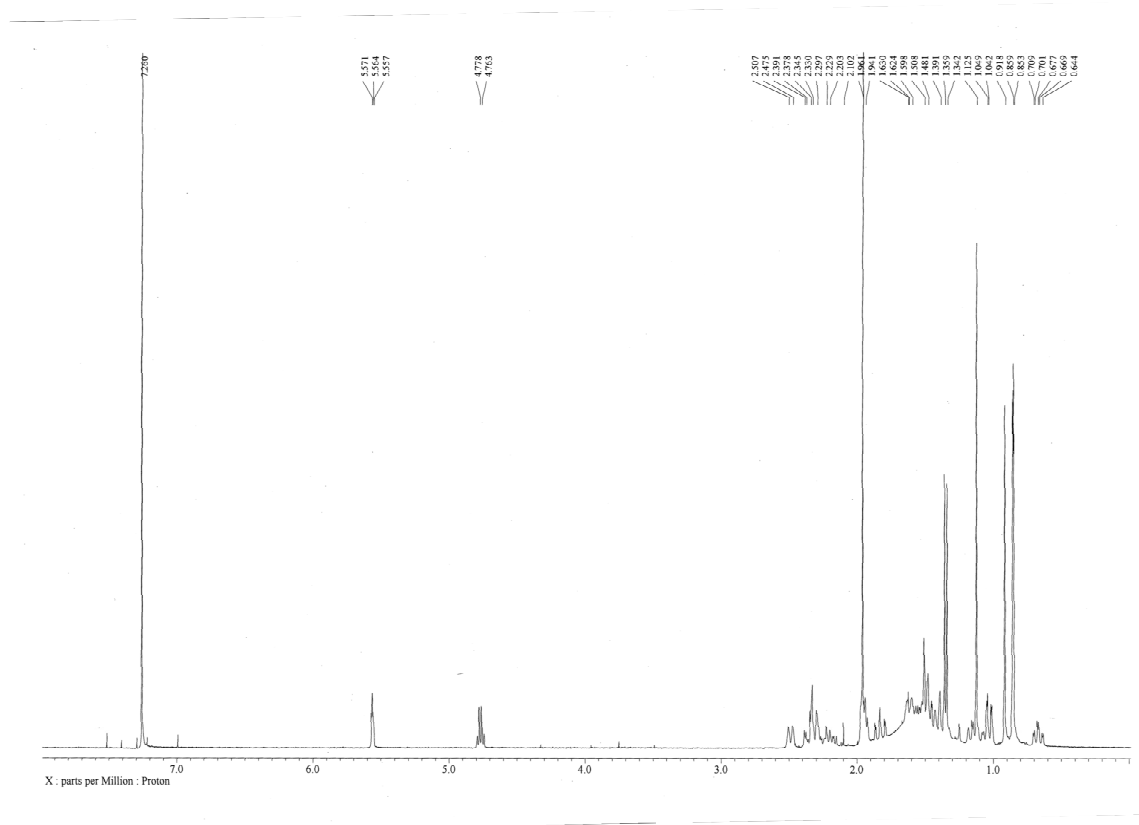

**Figure S13.**  $^1\text{H}$  NMR spectrum (400 MHz) of compound **2** in  $\text{CDCl}_3$ .

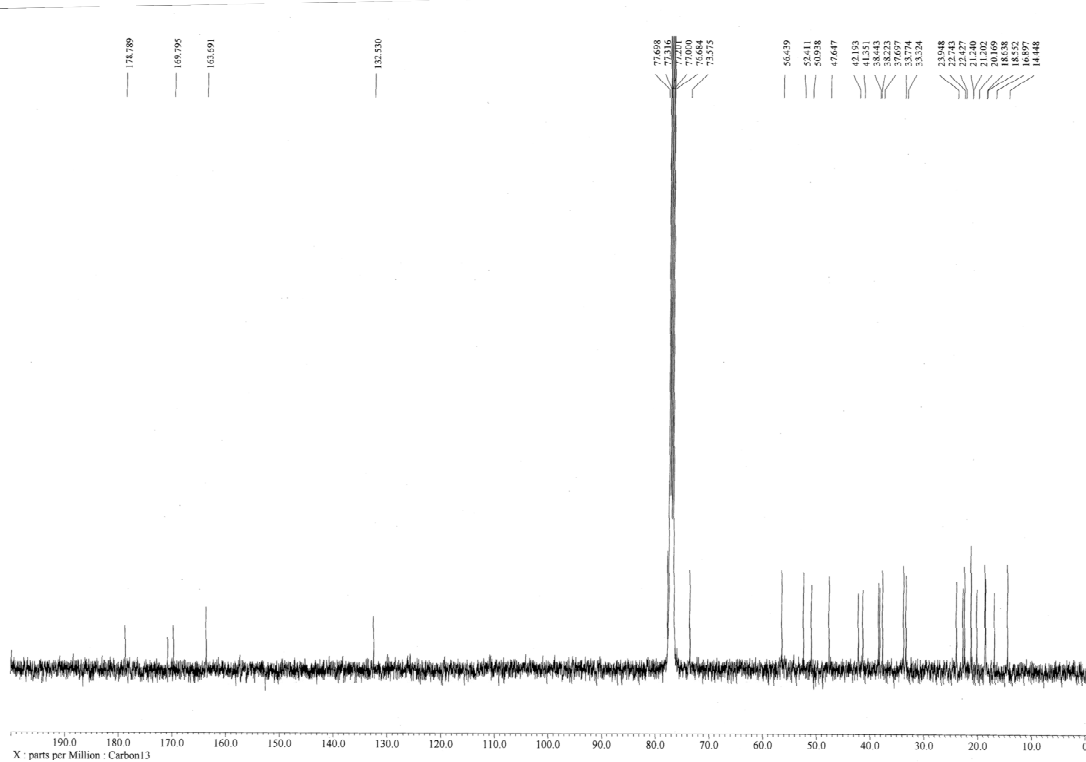

**Figure S14.**  $^{13}\text{C}$  NMR spectrum (100 MHz) of compound **2** in  $\text{CDCl}_3$ .



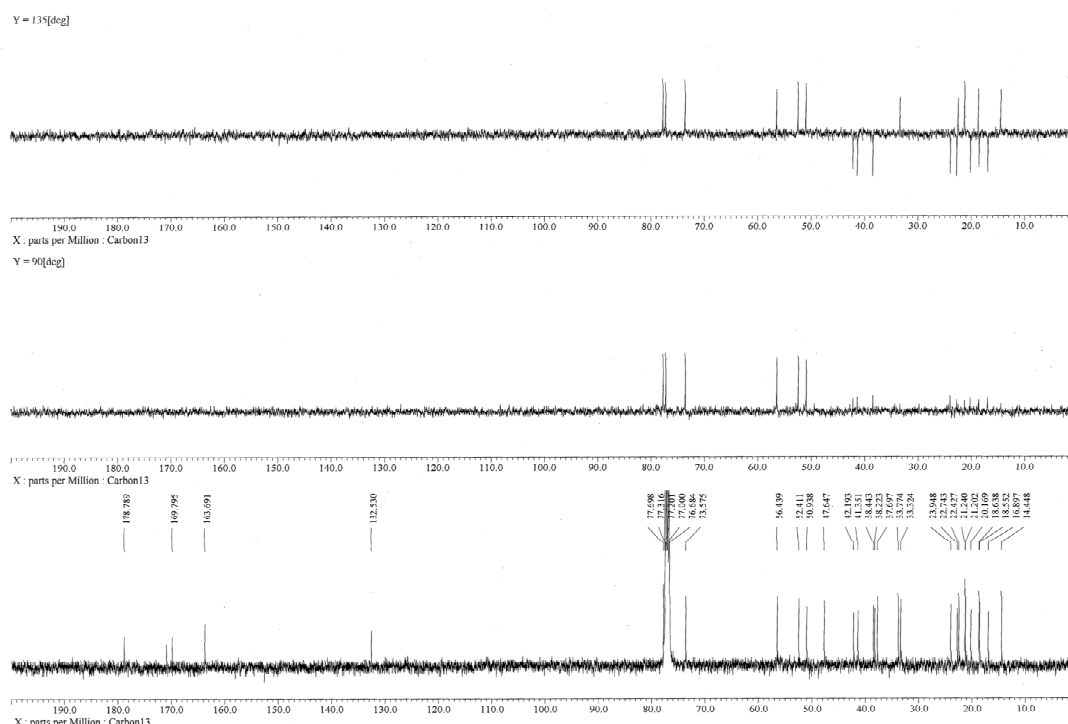

Figure S15. DEPT spectrum of compound 2 in CDCl<sub>3</sub>.

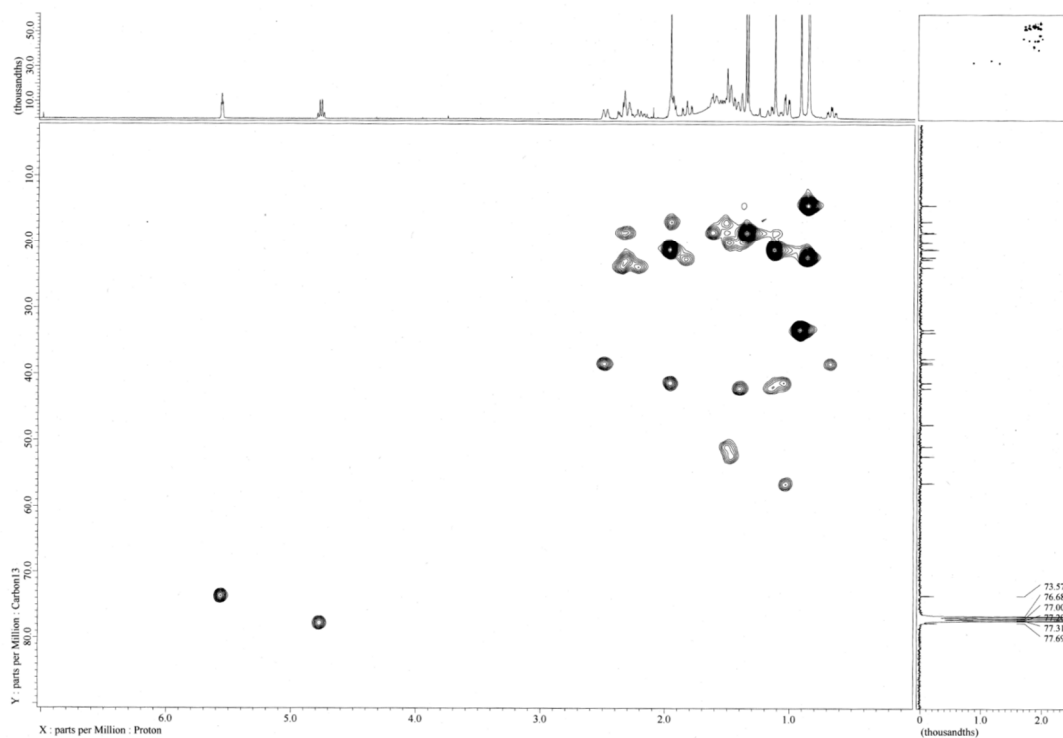

Figure S16. HSQC spectrum of compound 2 in CDCl<sub>3</sub>.

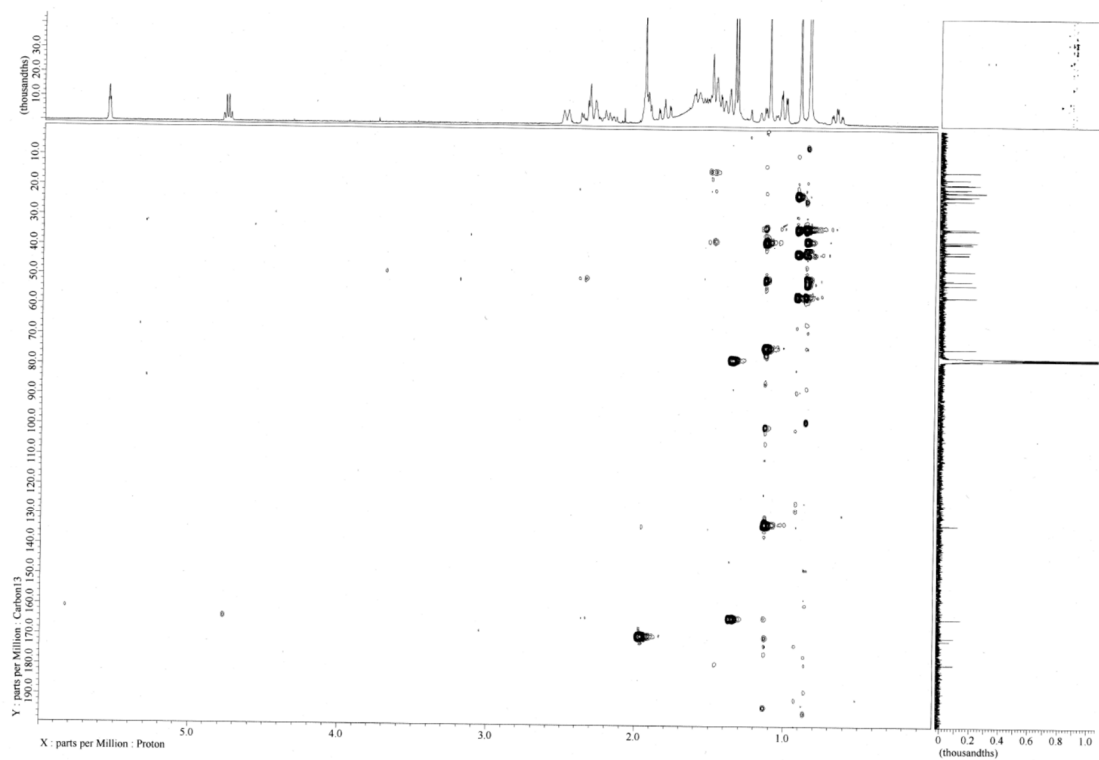

**Figure S17.** HMBC spectrum of compound **2** in CDCl<sub>3</sub>.

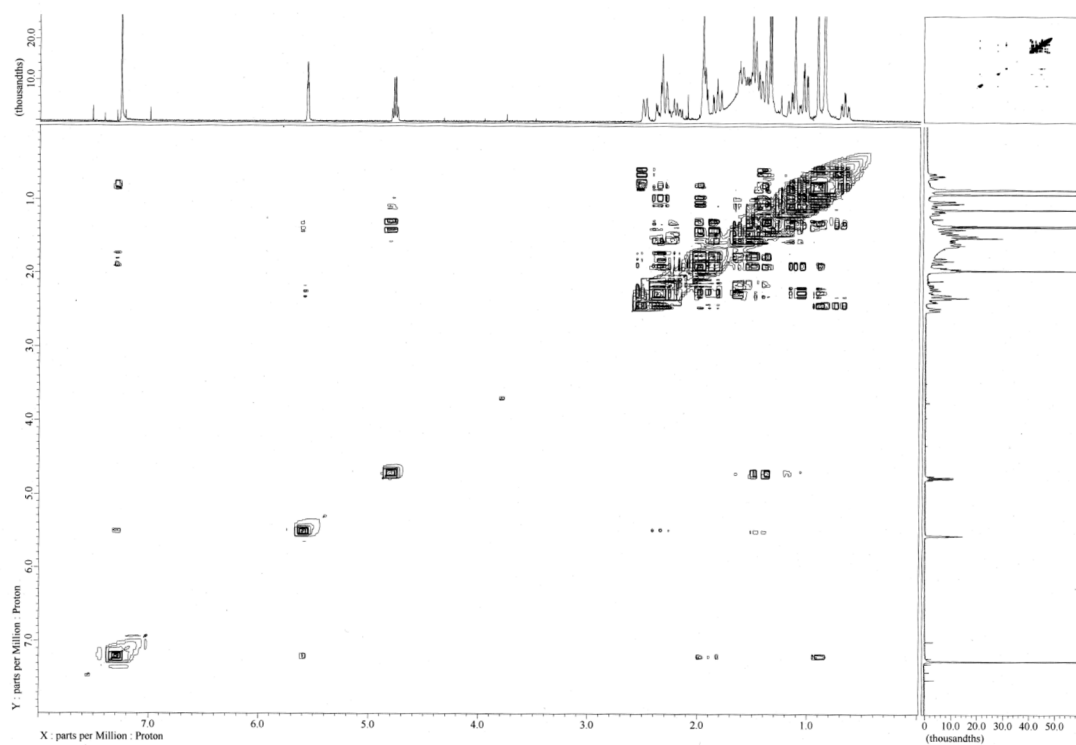

**Figure S18.** <sup>1</sup>H-<sup>1</sup>H COSY spectrum of compound **2** in CDCl<sub>3</sub>.

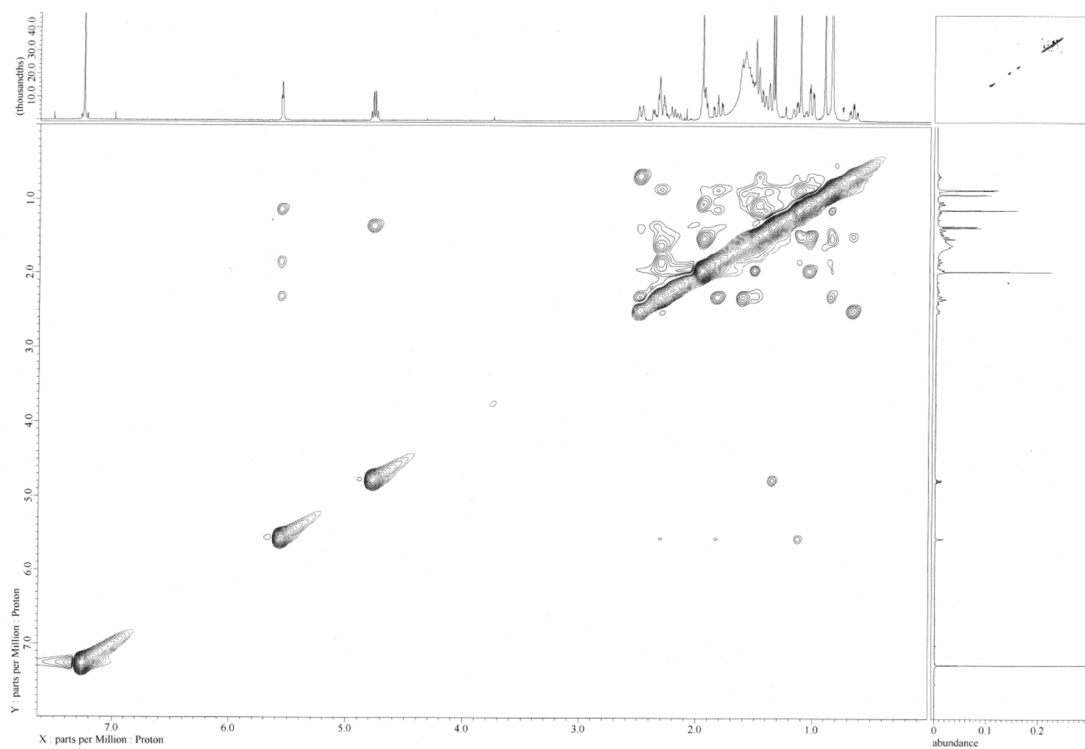

**Figure S19.** NOESY spectrum of compound **2** in  $\text{CDCl}_3$

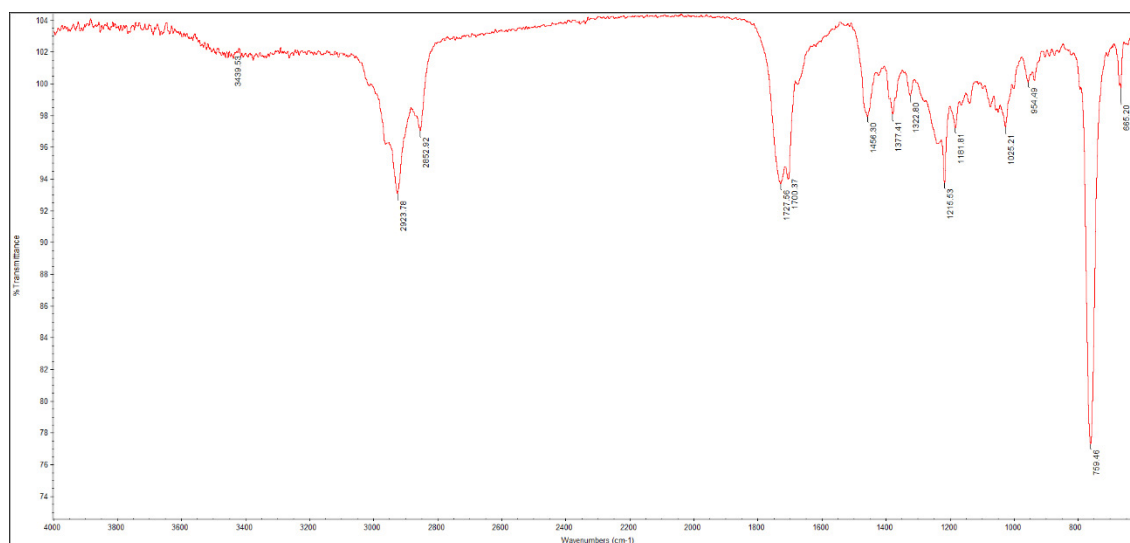

**Figure S20.** IR spectrum of compound **3**.

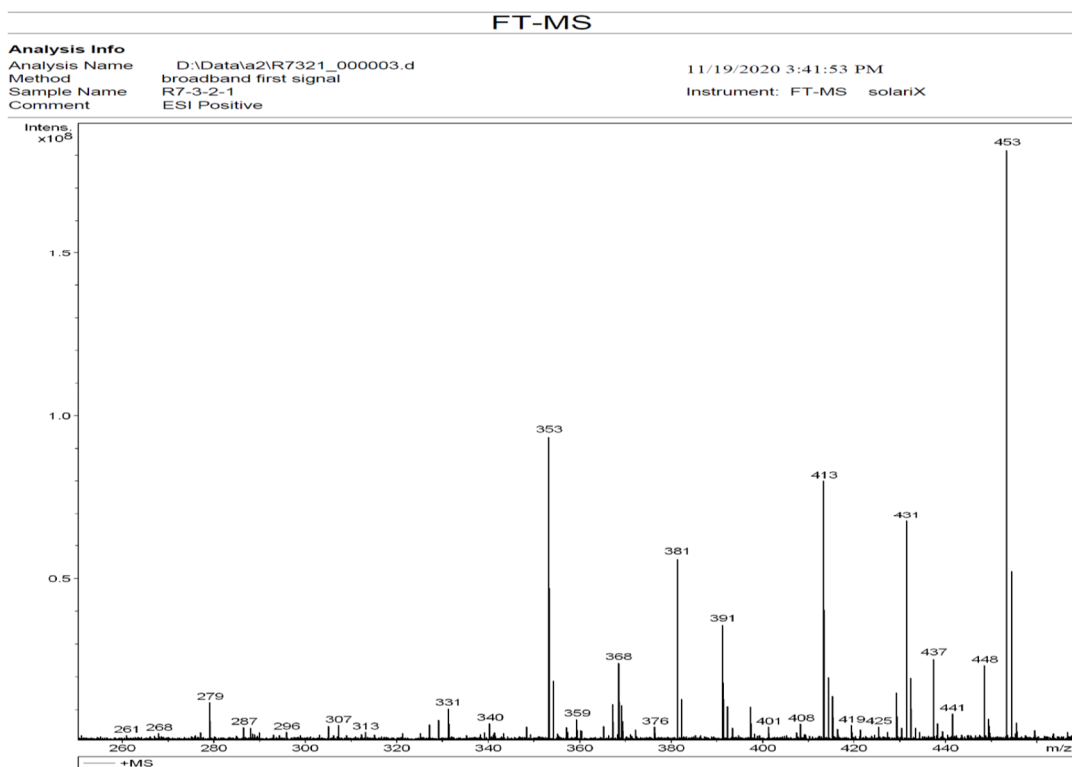

**Figure S21.** ESIMS spectrum of compound 3.

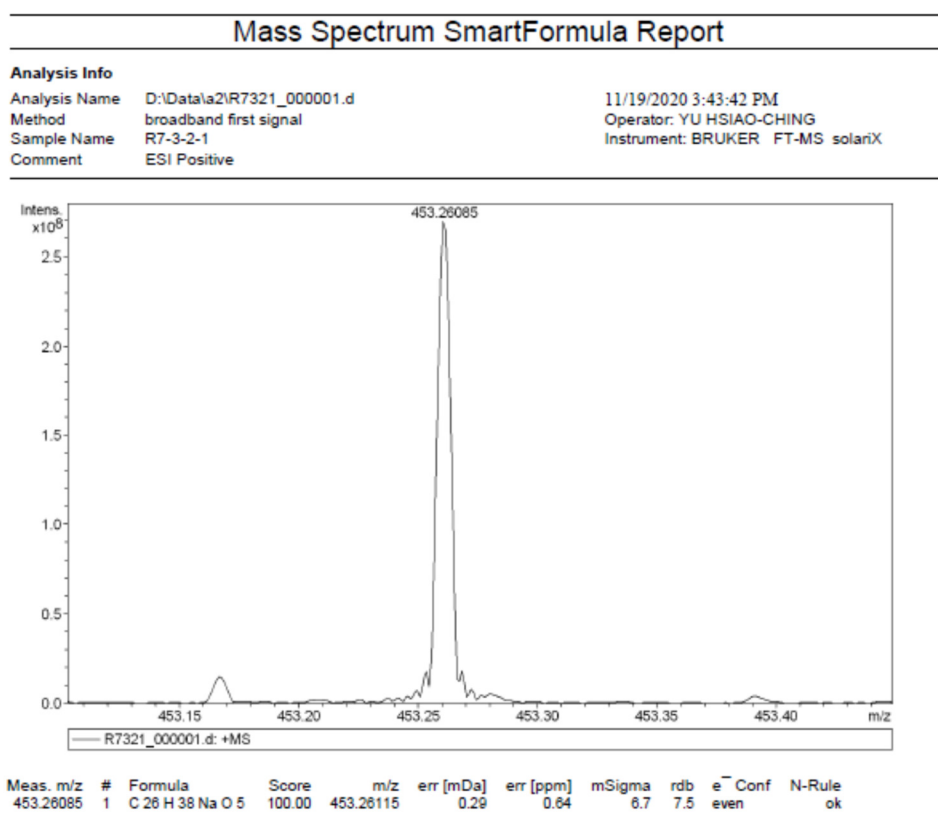

**Figure S22.** HRESIMS spectrum of compound 3.



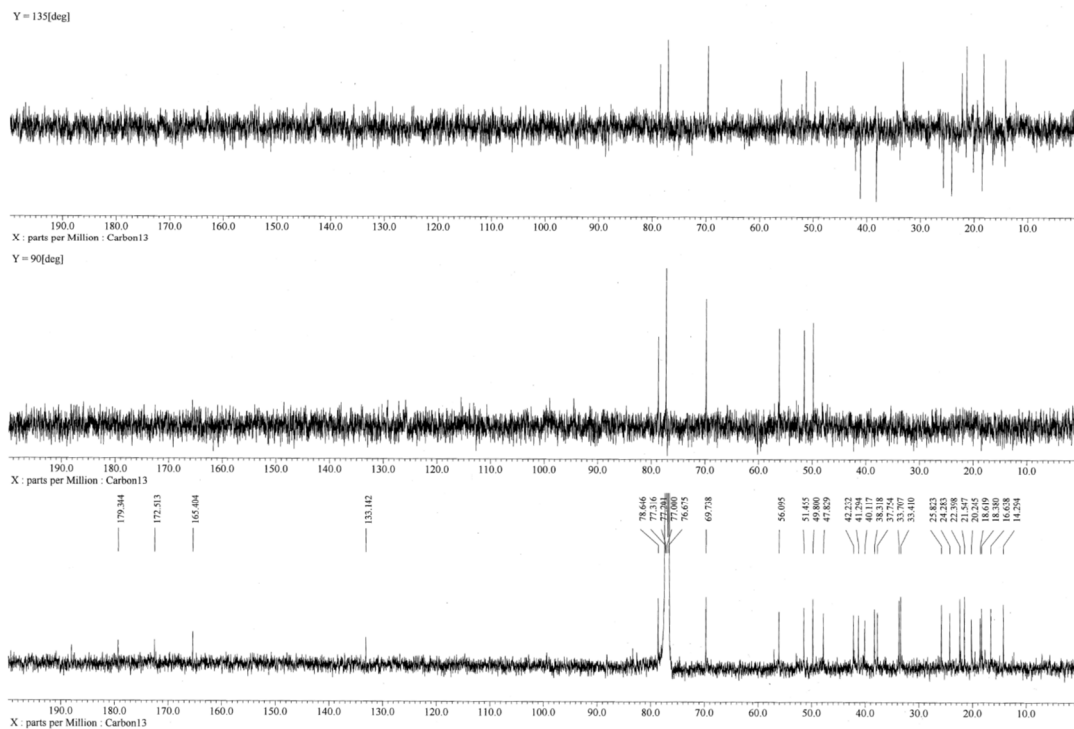

Figure S25. DEPT spectrum of compound 3 in CDCl<sub>3</sub>.

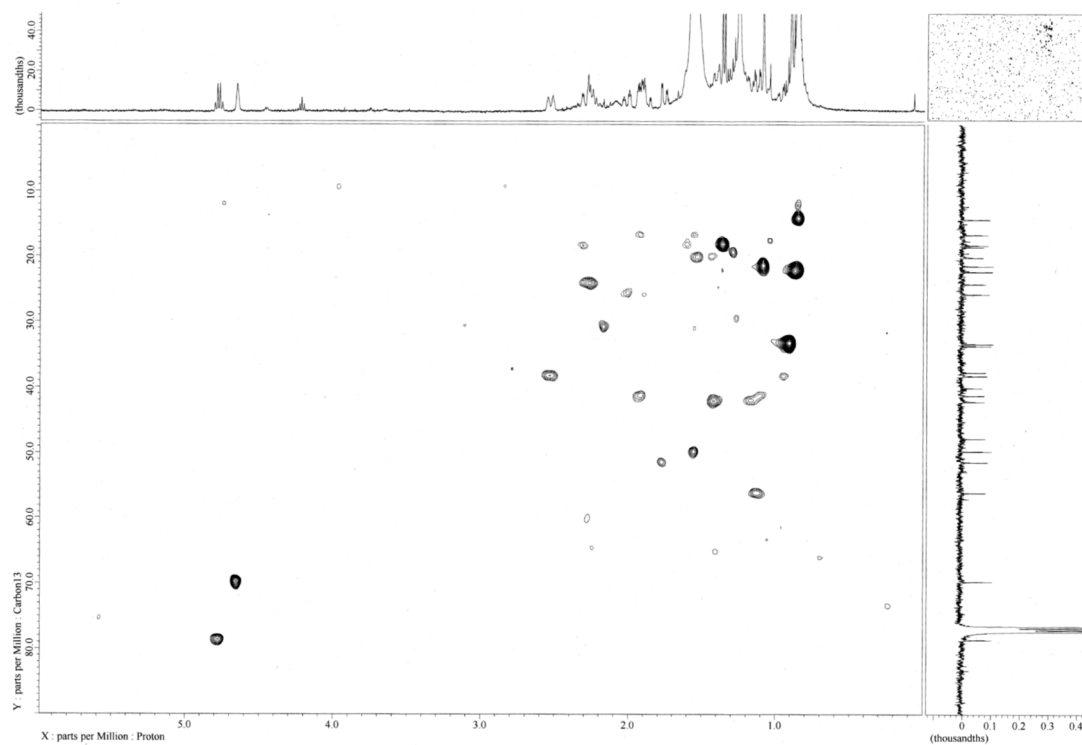

Figure S26. HSQC spectrum of compound 3 in CDCl<sub>3</sub>.

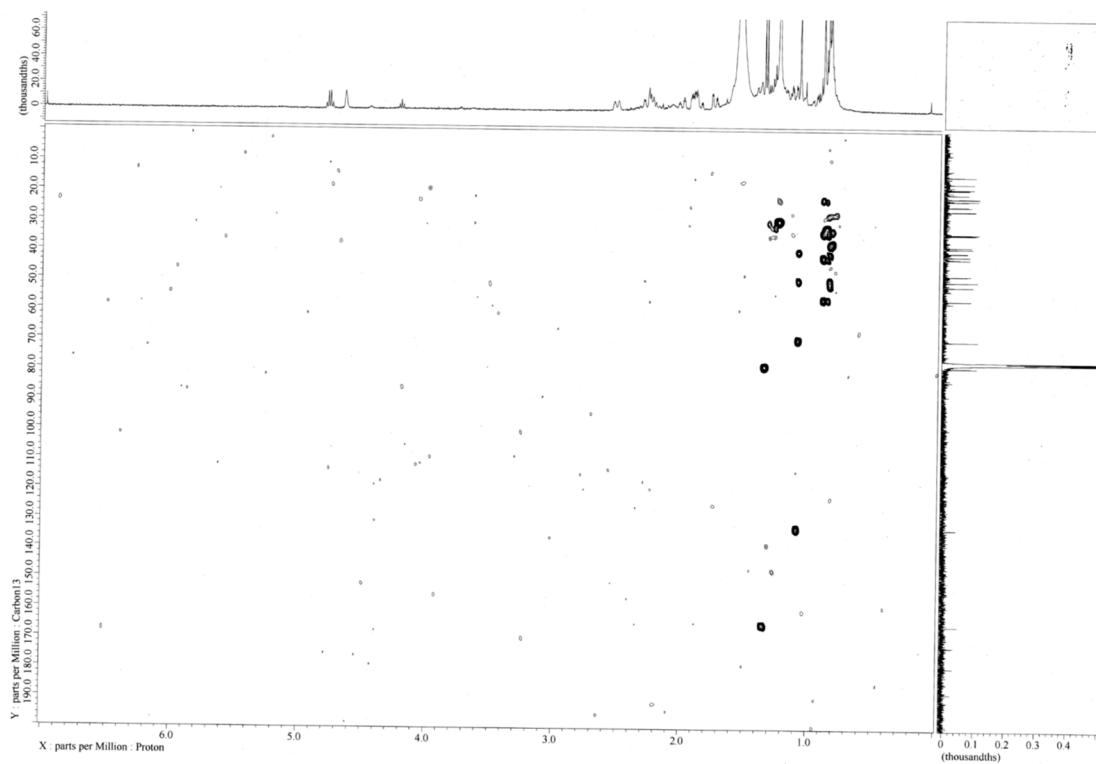

**Figure S27.** HMBC spectrum of compound **3** in CDCl<sub>3</sub>.

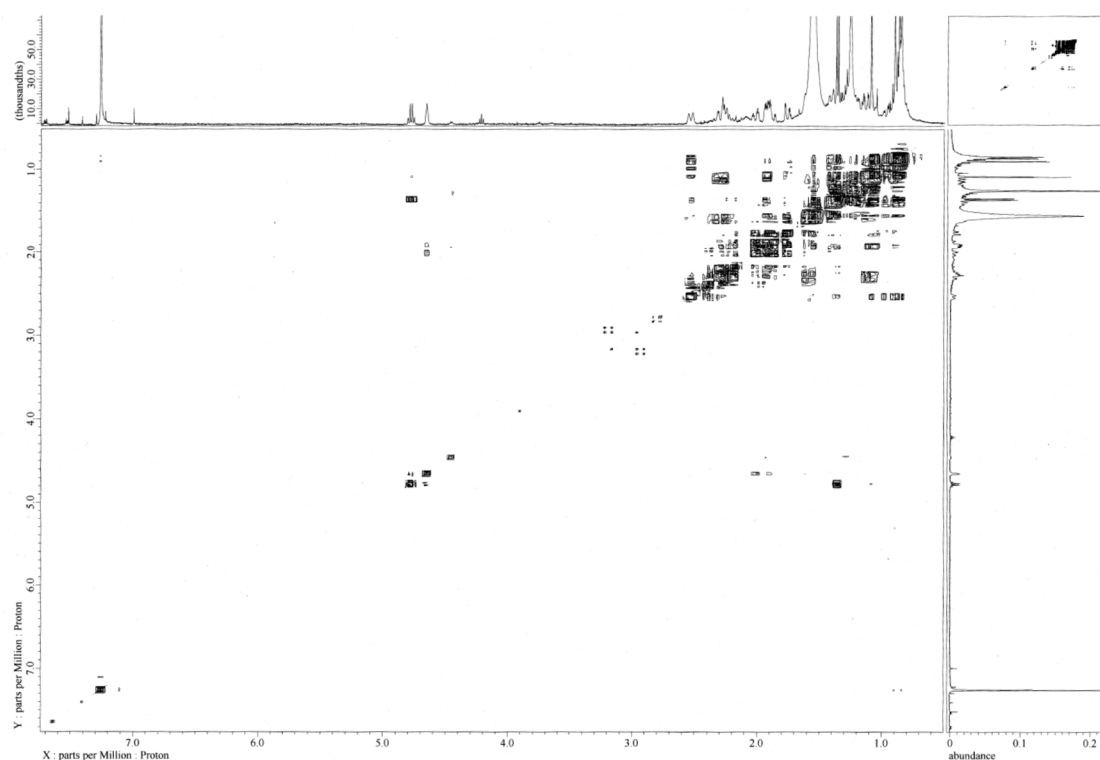

**Figure S28.** <sup>1</sup>H-<sup>1</sup>H COSY spectrum of compound **3** in CDCl<sub>3</sub>.

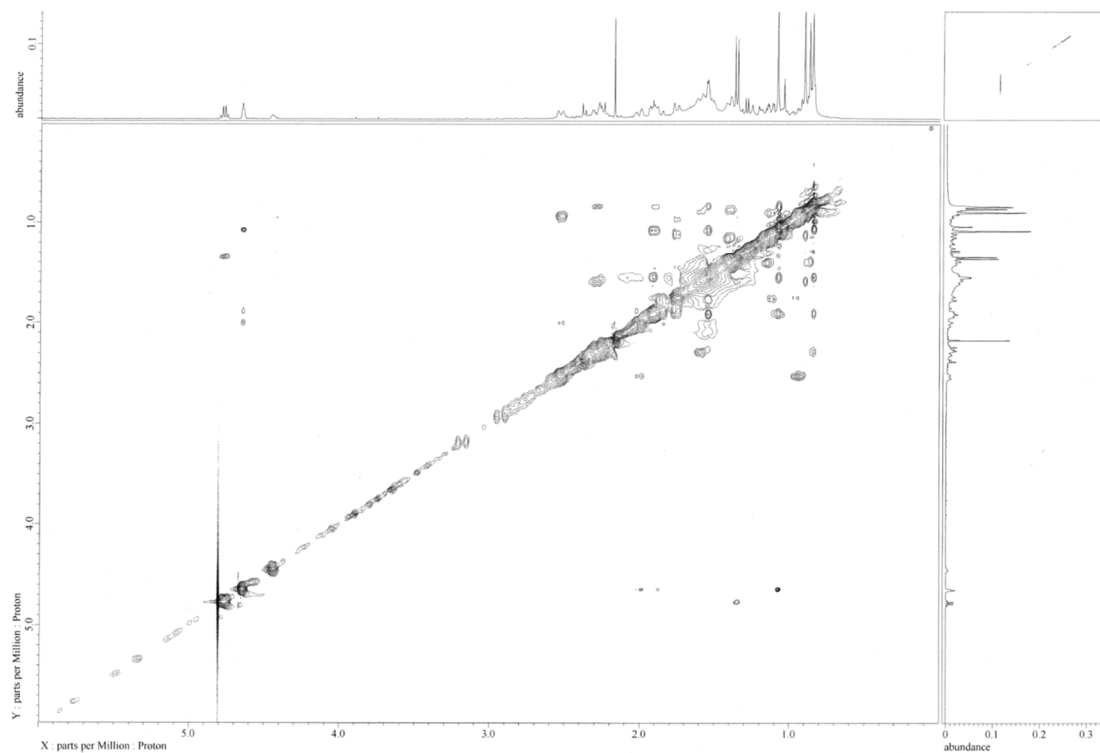

**Figure S29.** NOESY spectrum of compound **3** in  $\text{CDCl}_3$

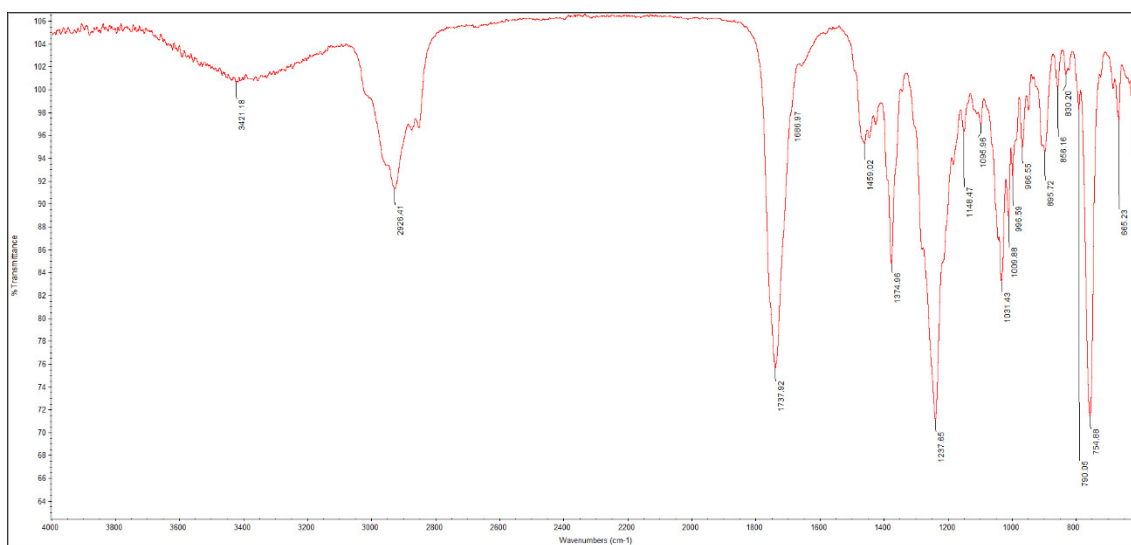

**Figure S30.** IR spectrum of compound **4**.



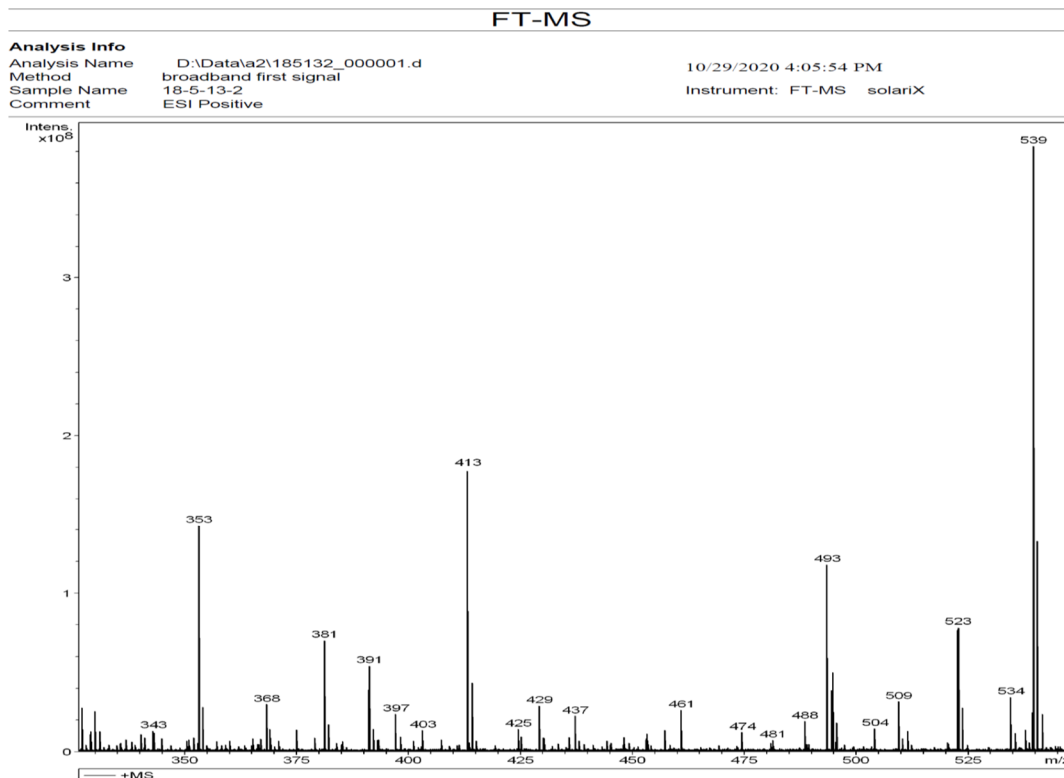

**Figure S31.** ESIMS spectrum of compound **4**.

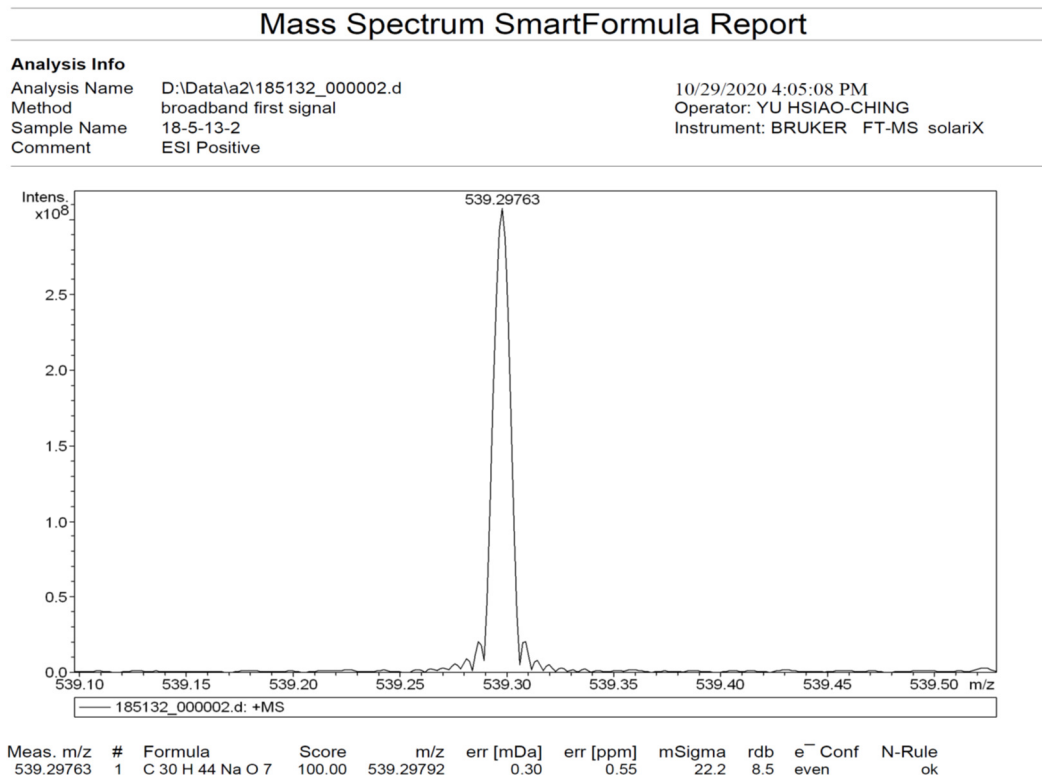

**Figure S32.** HRESIMS spectrum of compound **4**.

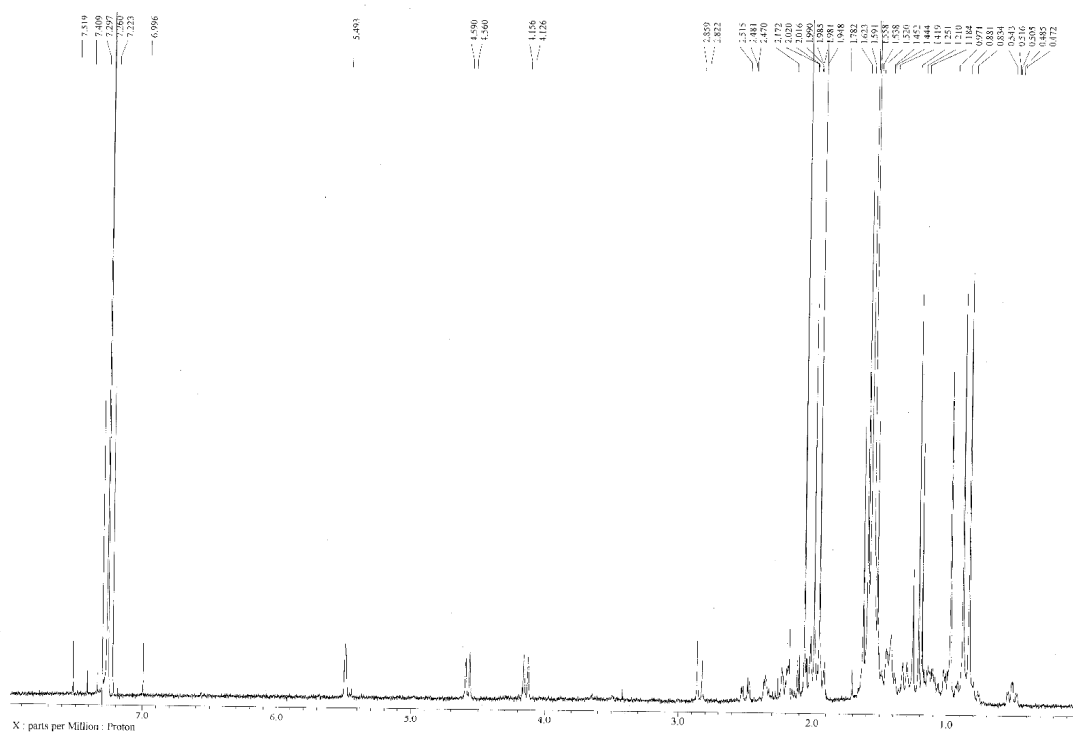

**Figure S33.**  $^1\text{H}$  NMR spectrum (400 MHz) of compound **4** in  $\text{CDCl}_3$ .

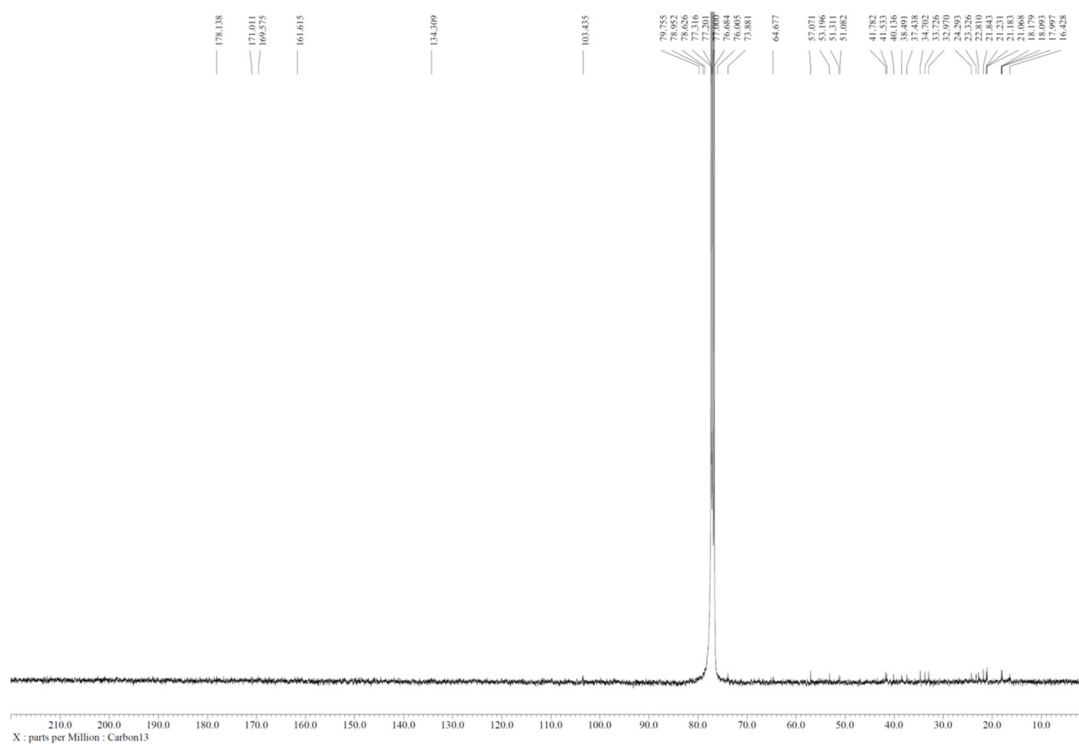

**Figure S34.**  $^{13}\text{C}$  NMR spectrum (100 MHz) of compound **4** in  $\text{CDCl}_3$ .

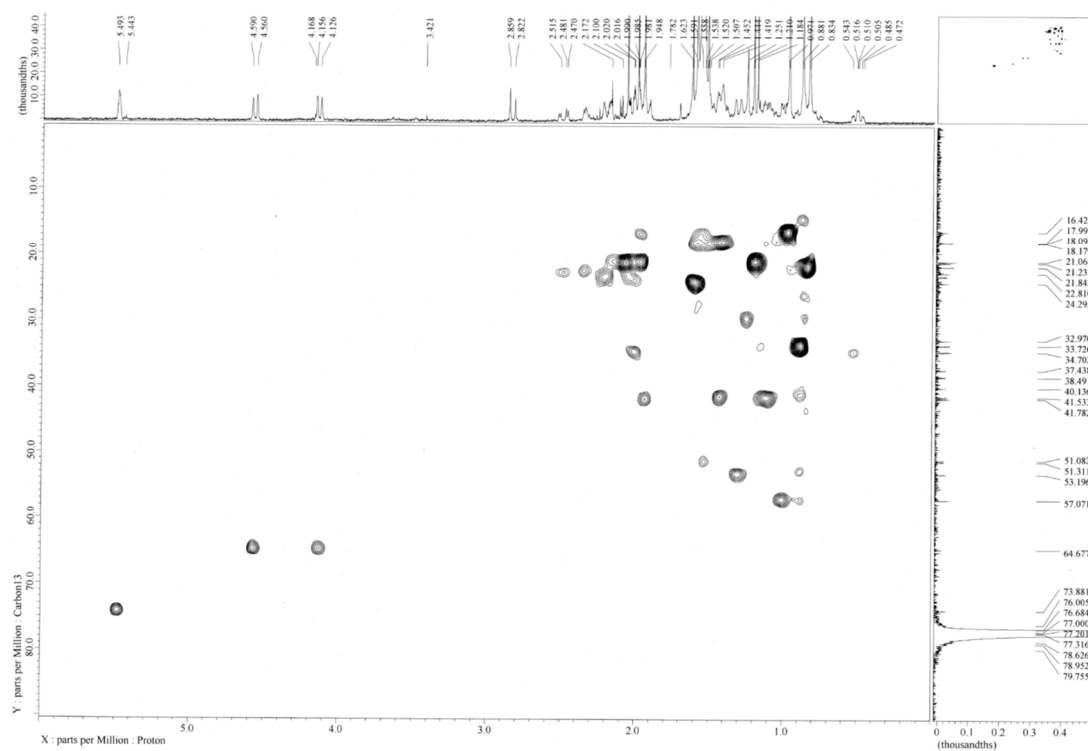

**Figure S35.** HSQC spectrum of compound **4** in CDCl<sub>3</sub>.

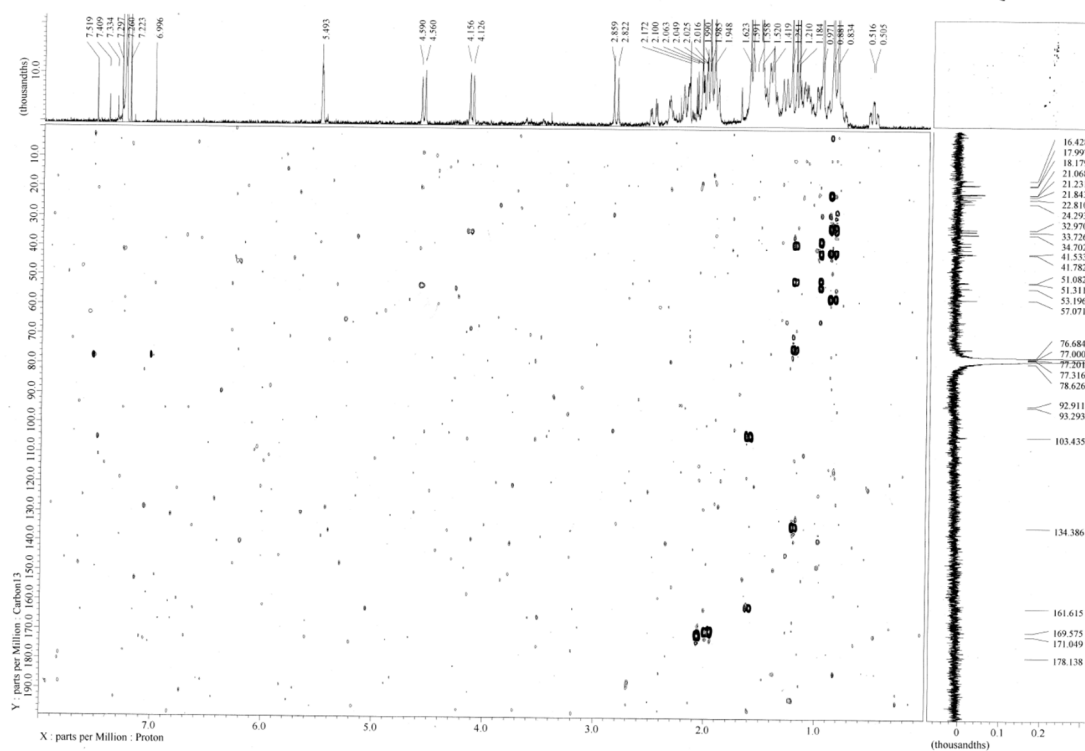

**Figure S36.** HMBC spectrum of compound **4** in CDCl<sub>3</sub>.

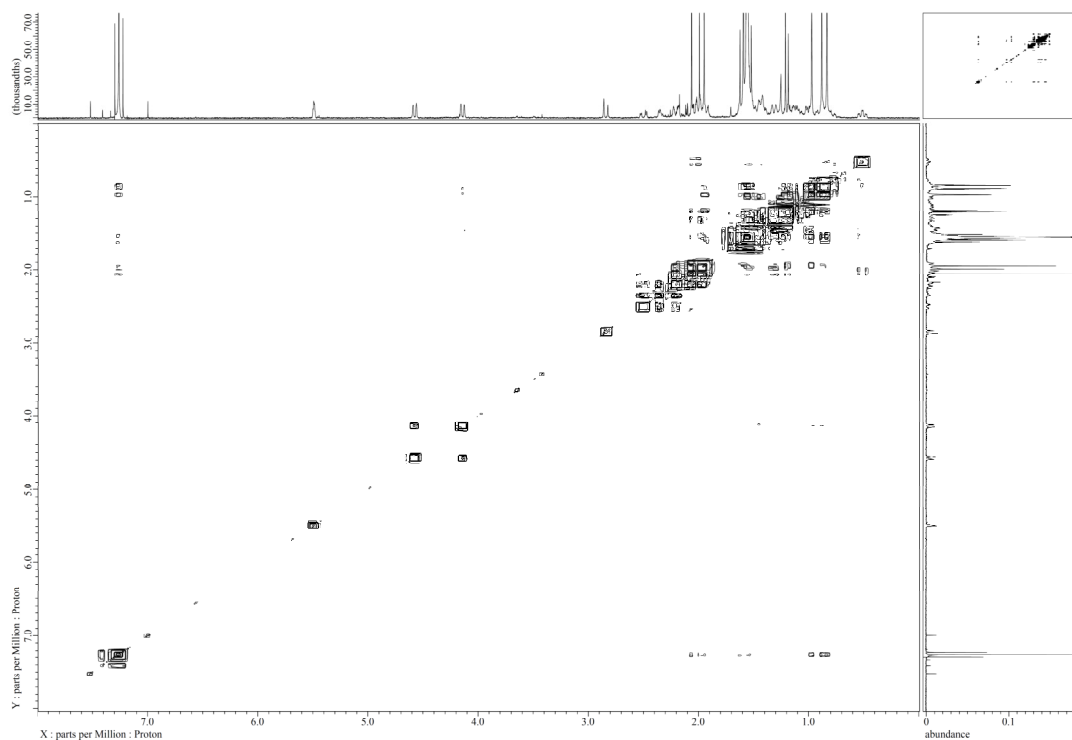

**Figure S37.**  $^1\text{H}$ - $^1\text{H}$  COSY spectrum of compound **4** in  $\text{CDCl}_3$ .

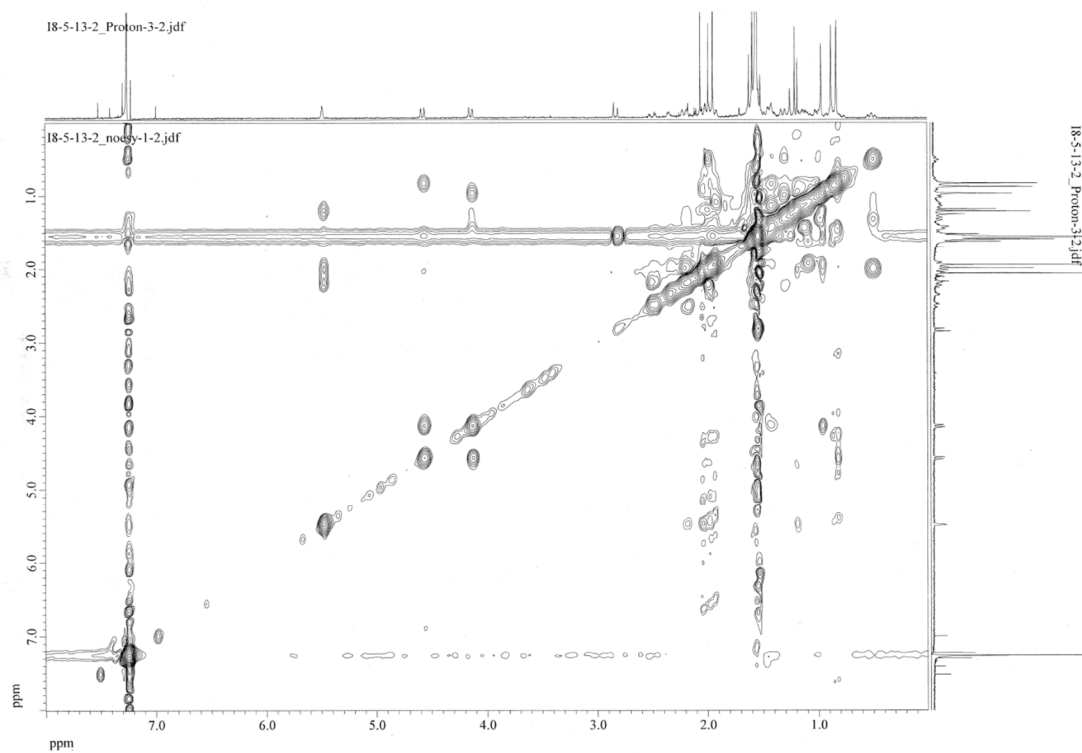

**Figure S38.** NOESY spectrum of compound **4** in  $\text{CDCl}_3$

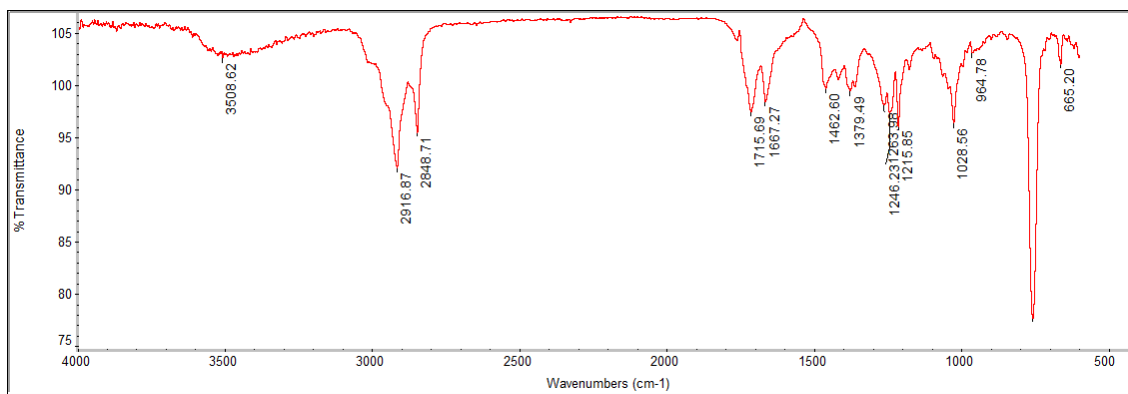

Figure S39. IR spectrum of compound 5.

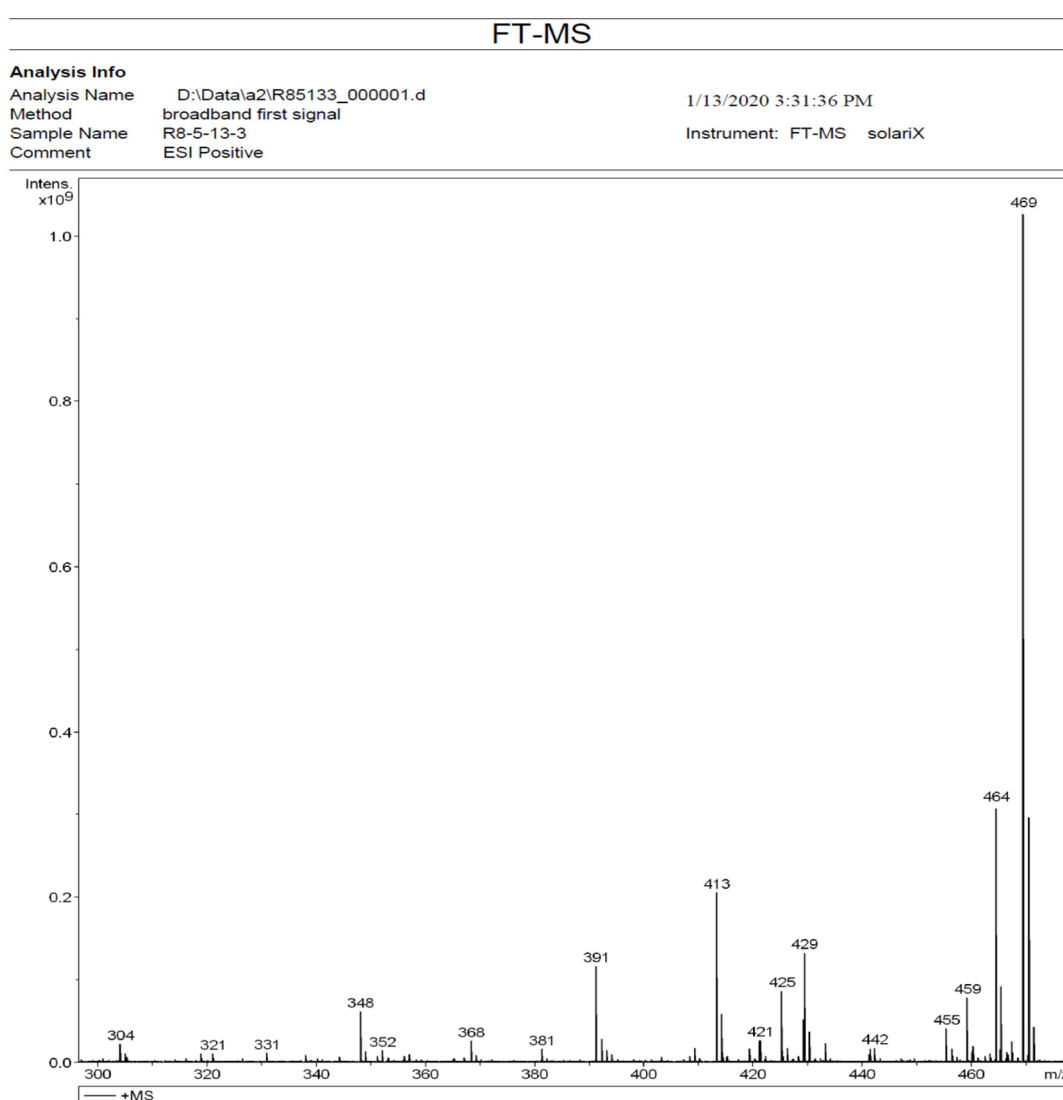

Figure S40. ESIMS spectrum of compound 5.

## Mass Spectrum SmartFormula Report

### Analysis Info

Analysis Name D:\Data\2\R85133\_000002.d  
 Method broadband first signal  
 Sample Name R8-5-13-3  
 Comment ESI Positive

1/13/2020 3:30:43 PM  
 Operator: YU HSIAO-CHING  
 Instrument: BRUKER FT-MS solariX

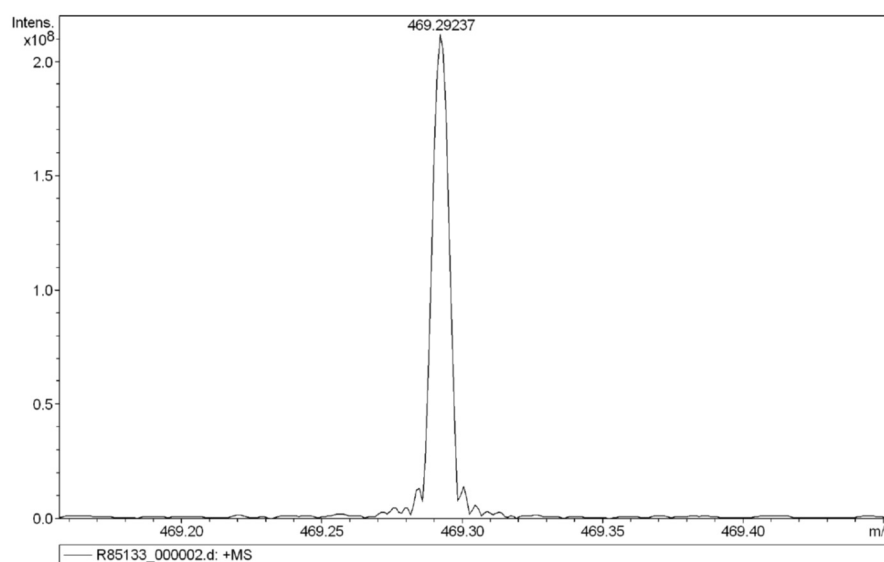

| Meas. m/z | # | Formula                                          | Score  | m/z       | err [mDa] | err [ppm] | mSigma | rdb | e <sup>-</sup> | Conf | N-Rule |
|-----------|---|--------------------------------------------------|--------|-----------|-----------|-----------|--------|-----|----------------|------|--------|
| 469.29237 | 1 | C <sub>27</sub> H <sub>42</sub> NaO <sub>5</sub> | 100.00 | 469.29245 | 0.07      | 0.15      | 7.2    | 6.5 | even           |      | ok     |

**Figure S41.** HRESIMS spectrum of compound **5**.

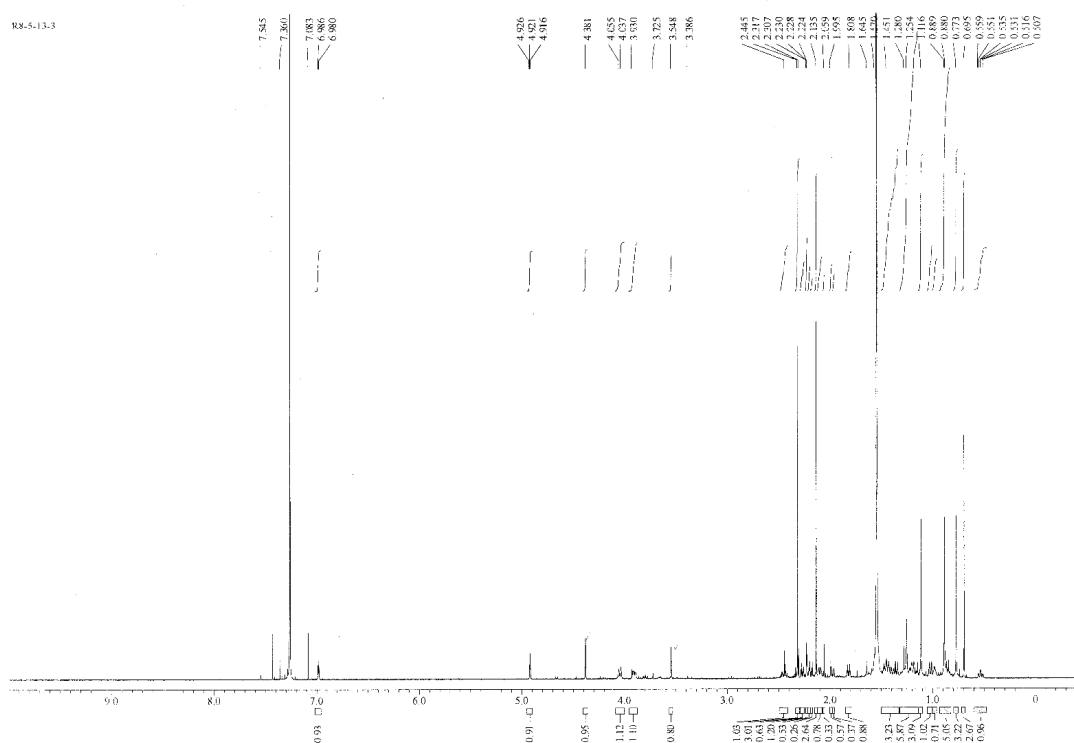

**Figure S42.** <sup>1</sup>H NMR spectrum (600 MHz) of compound **5** in CDCl<sub>3</sub>.

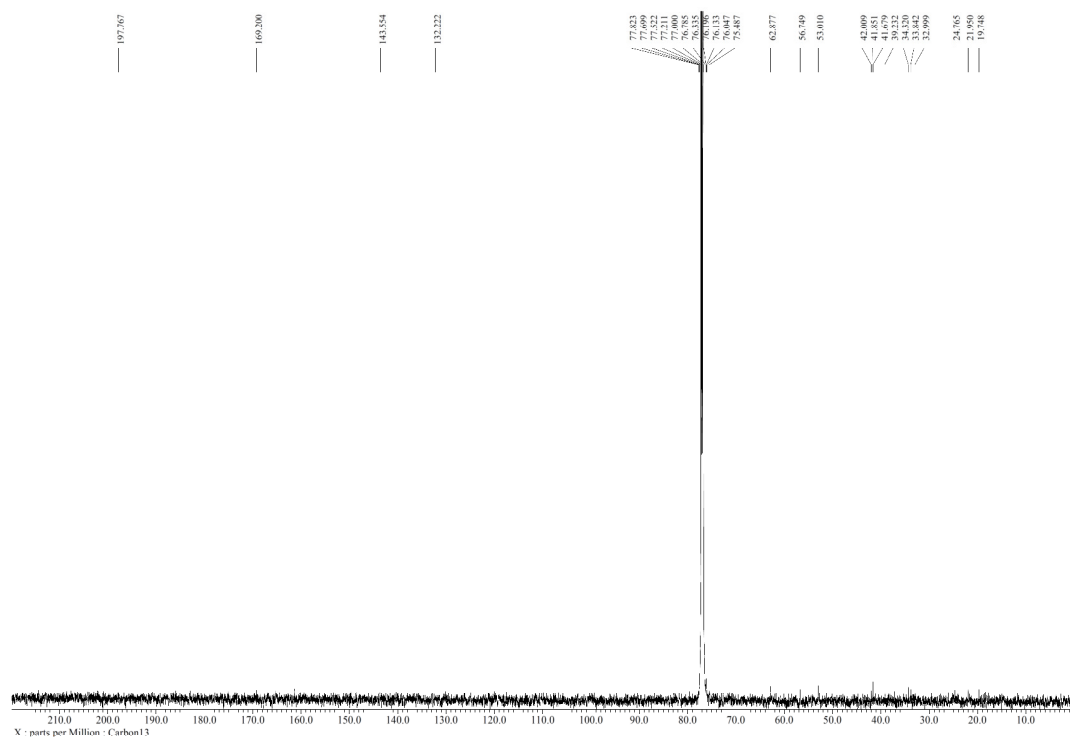

**Figure S43.**  $^{13}\text{C}$  NMR spectrum (150 MHz) of compound **5** in  $\text{CDCl}_3$ .

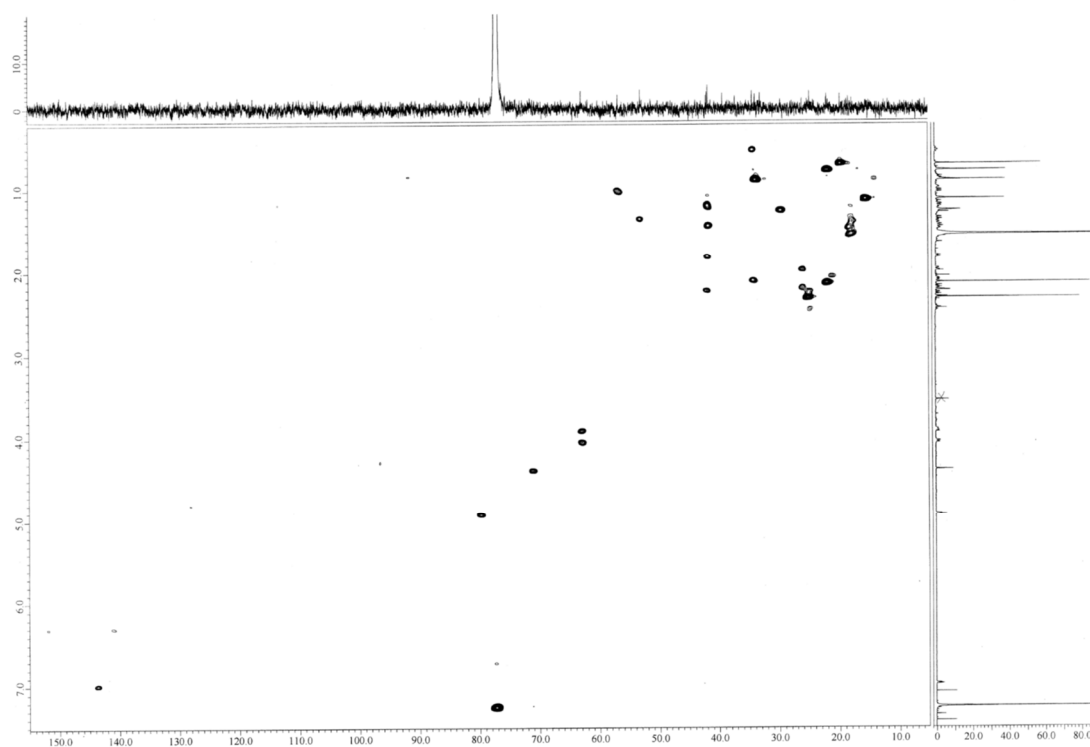

**Figure S44.** HSQC spectrum of compound **5** in  $\text{CDCl}_3$ .

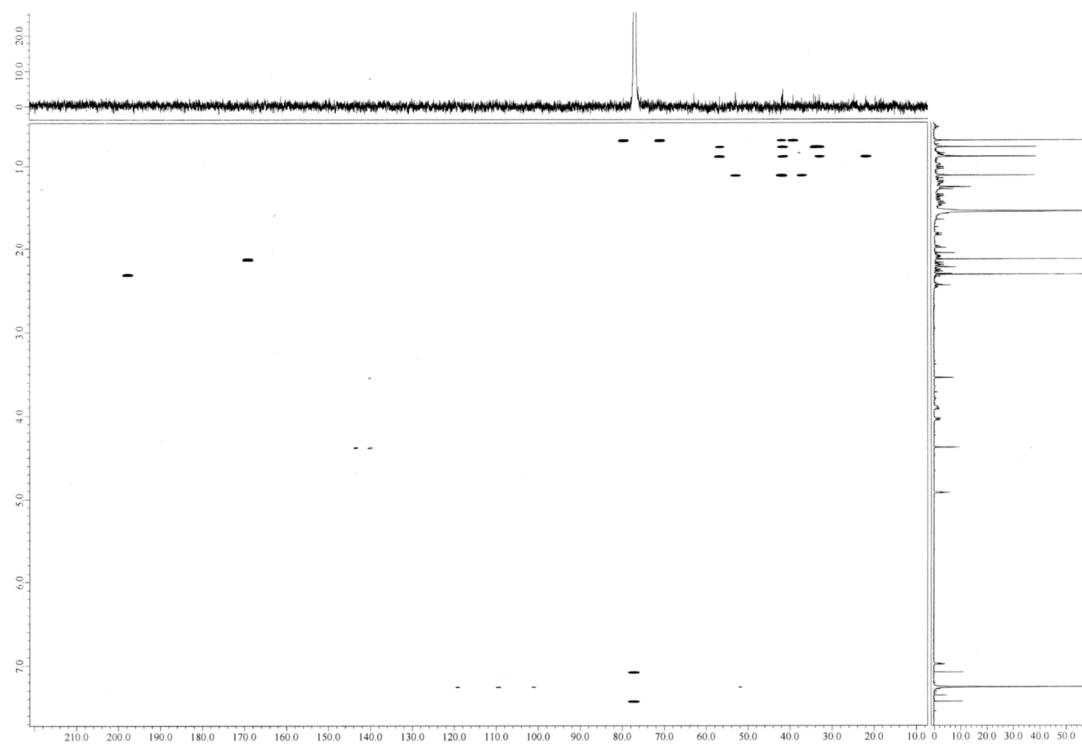

**Figure S45.** HMBC spectrum of compound **5** in CDCl<sub>3</sub>.

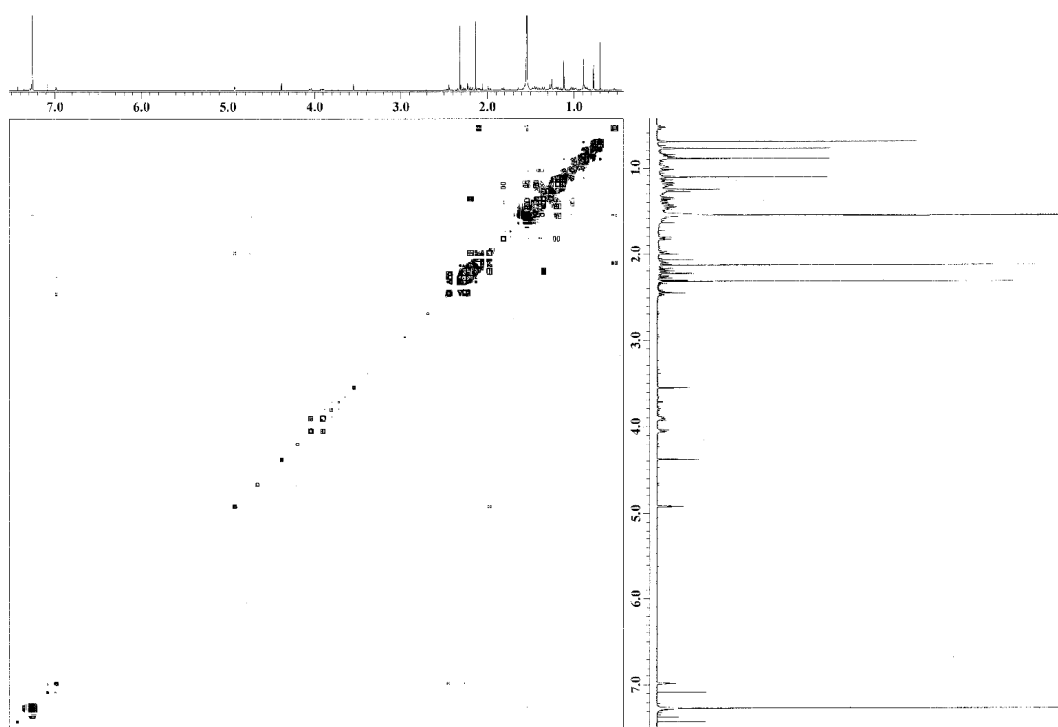

**Figure S46.** <sup>1</sup>H-<sup>1</sup>H COSY spectrum of compound **5** in CDCl<sub>3</sub>.



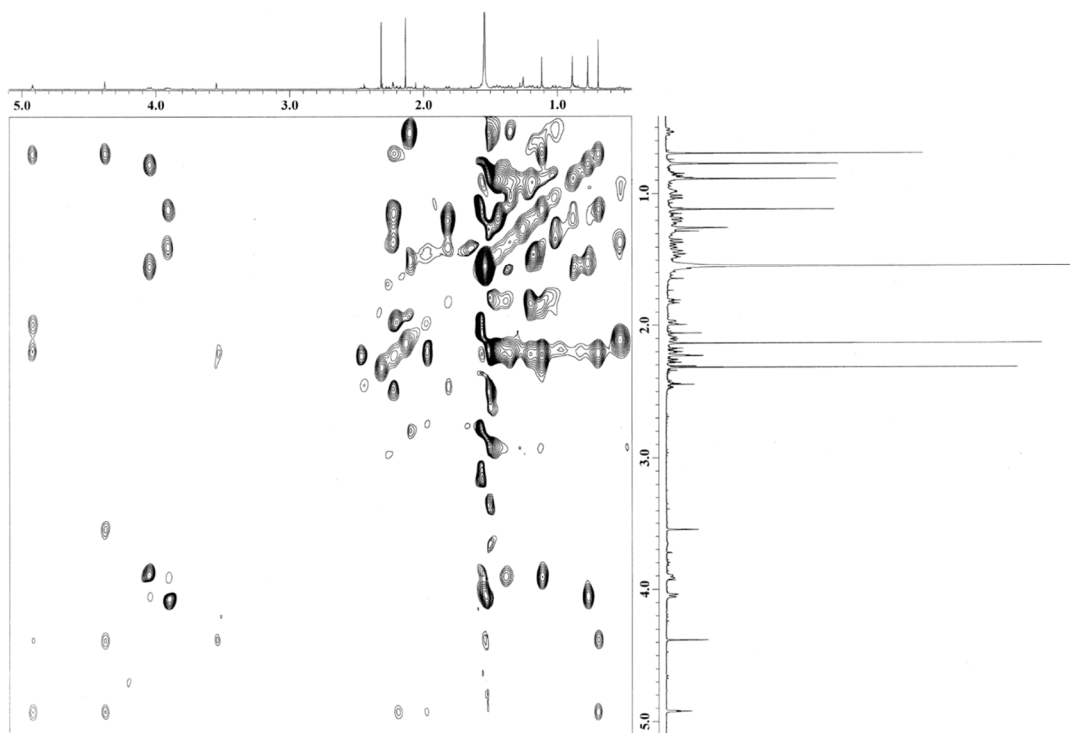

**Figure S47.** NOESY spectrum of compound **5** in CDCl<sub>3</sub>

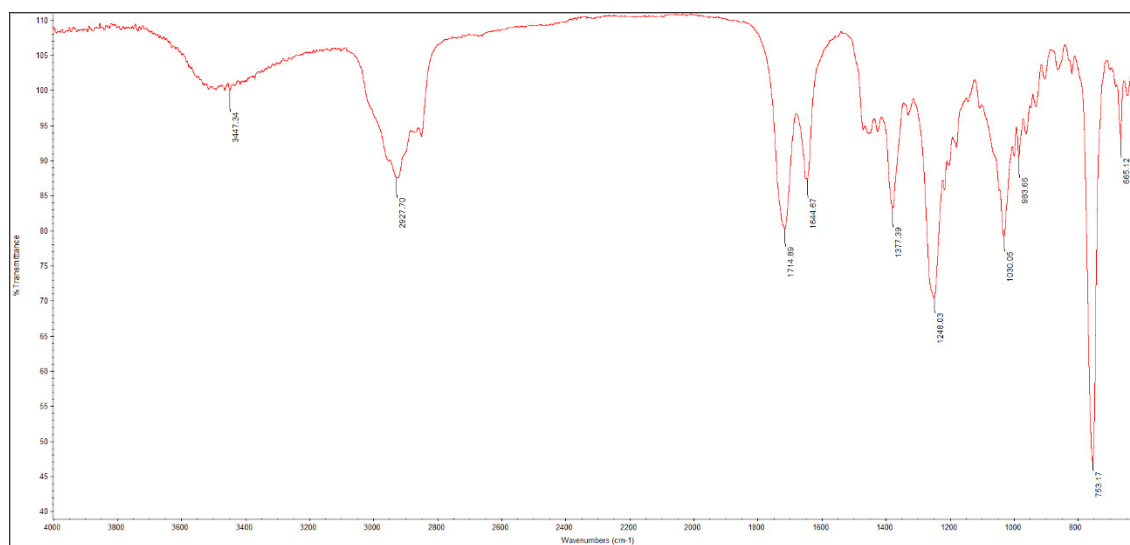

**Figure S48.** IR spectrum of compound **6**.

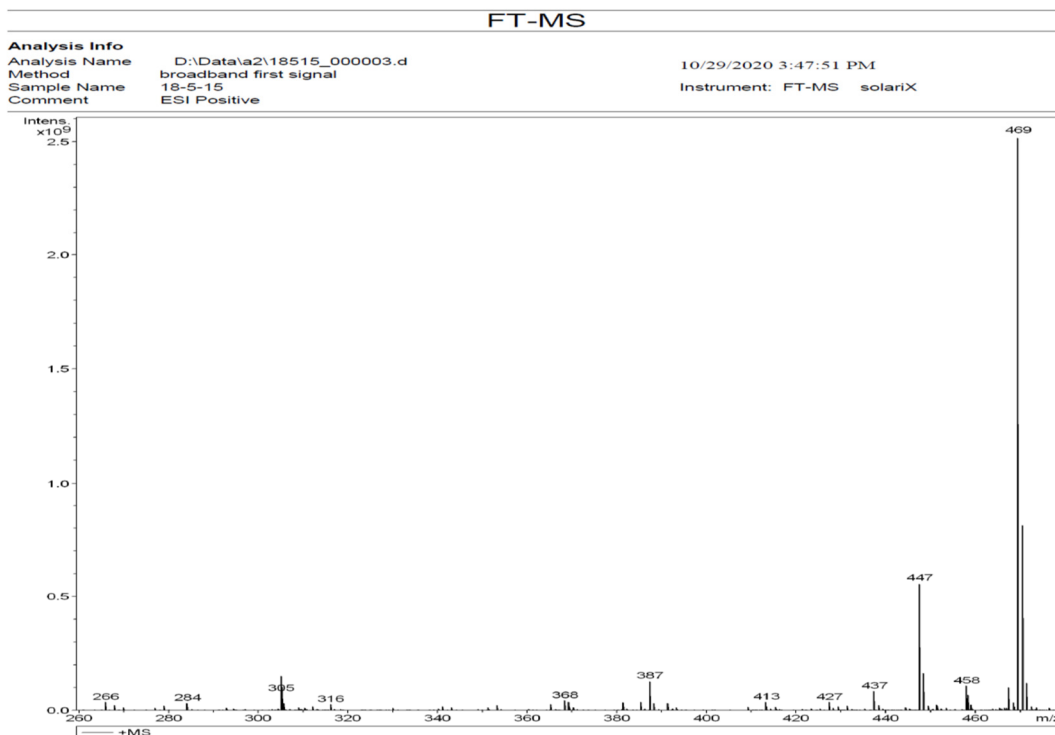

**Figure S49.** ESIMS spectrum of compound 6.

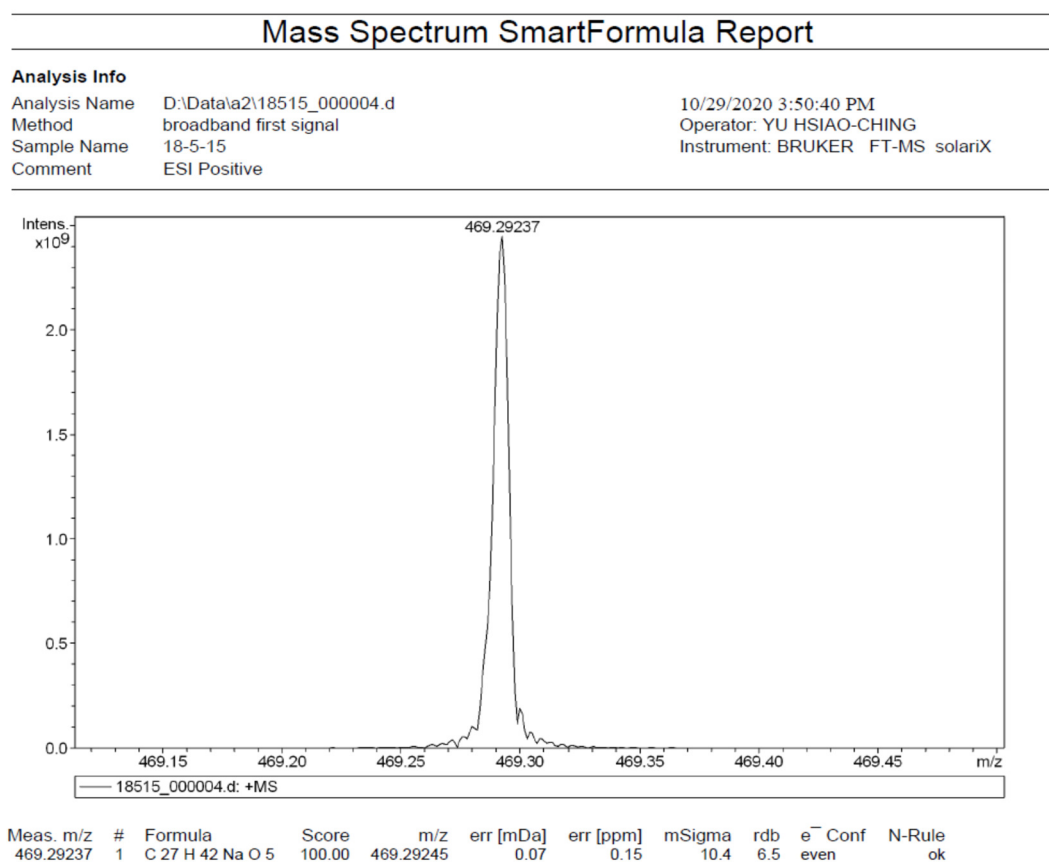

**Figure S50.** HRESIMS spectrum of compound 6.

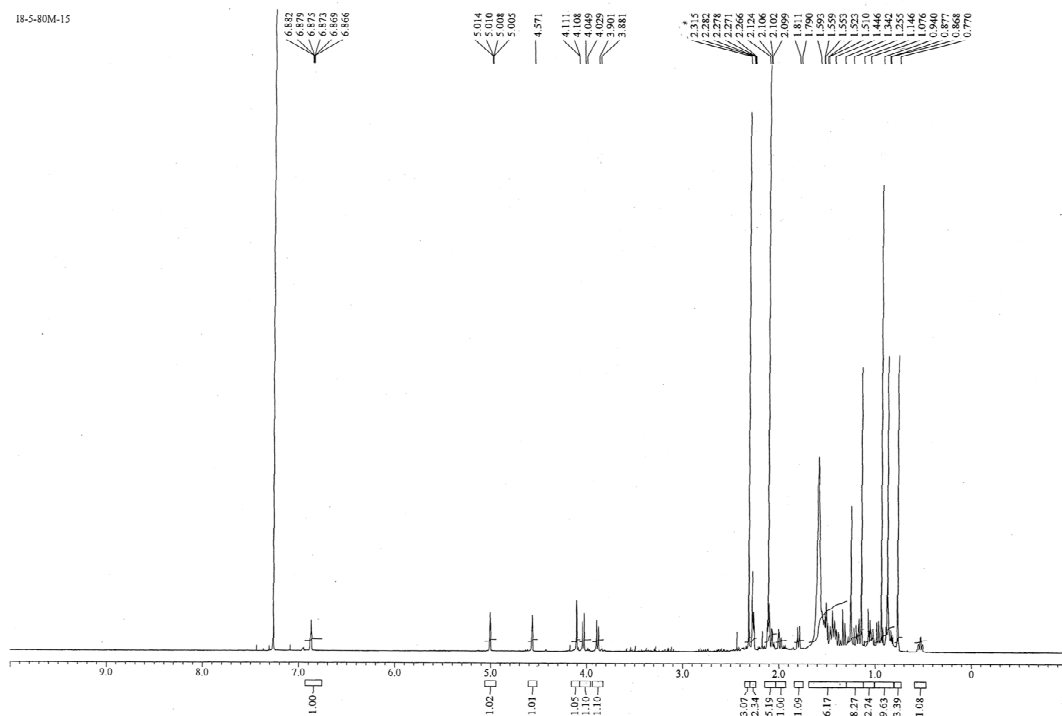

Figure S51.  $^1\text{H}$  NMR spectrum (600 MHz) of compound **6** in  $\text{CDCl}_3$ .

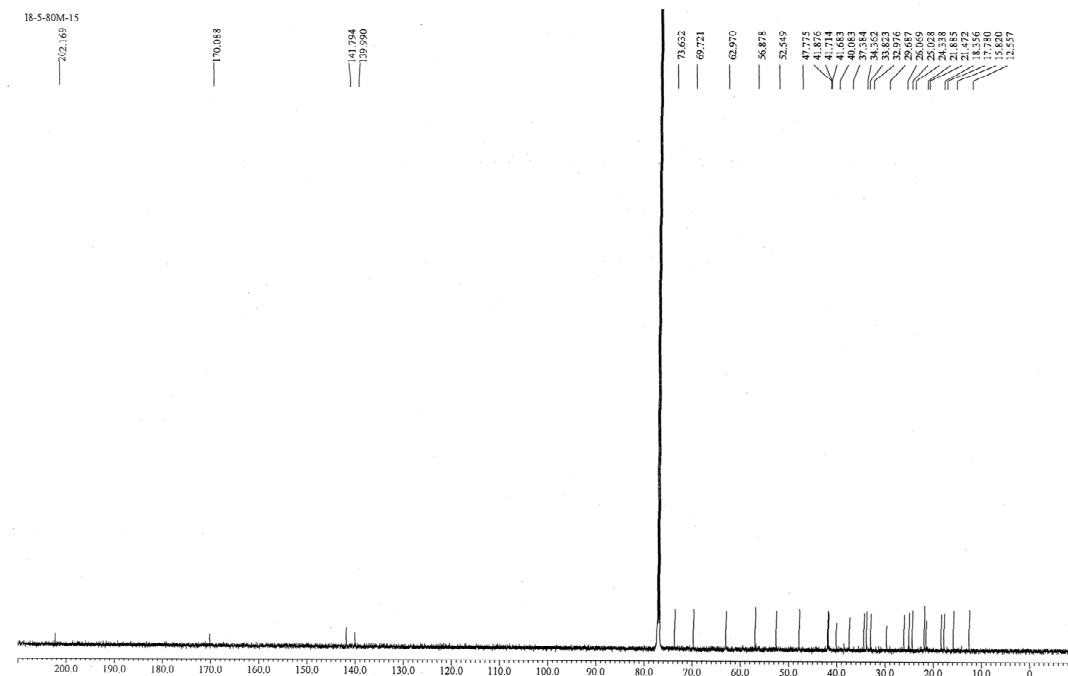

Figure S52.  $^{13}\text{C}$  NMR spectrum (150 MHz) of compound **6** in  $\text{CDCl}_3$ .

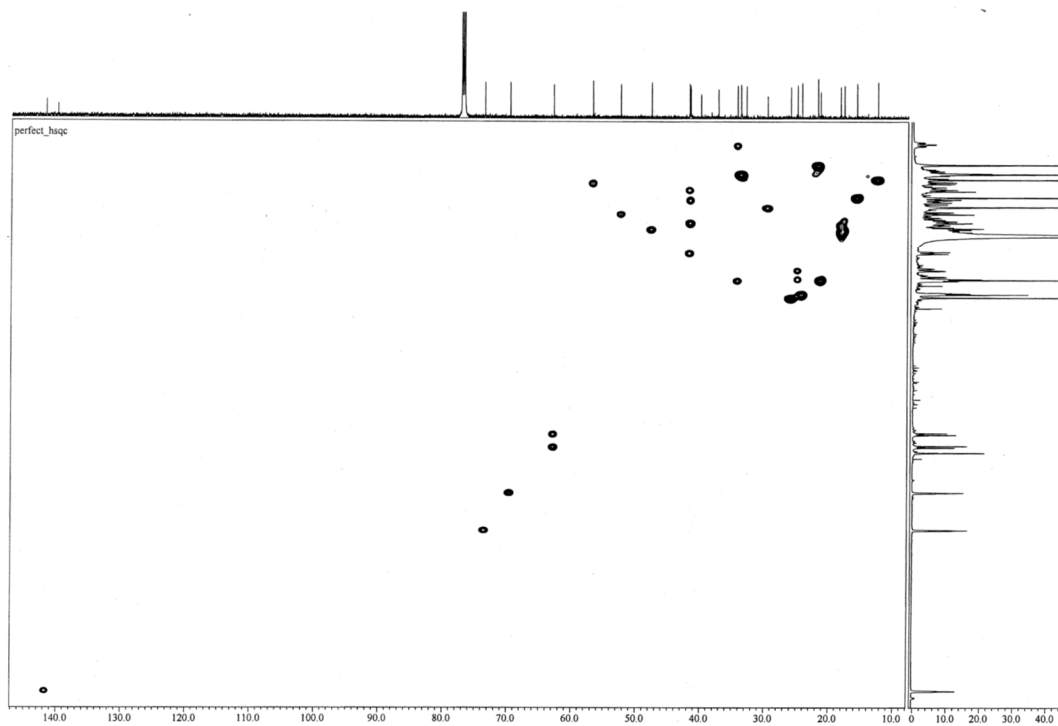

**Figure S53.** HSQC spectrum of compound **6** in  $\text{CDCl}_3$ .

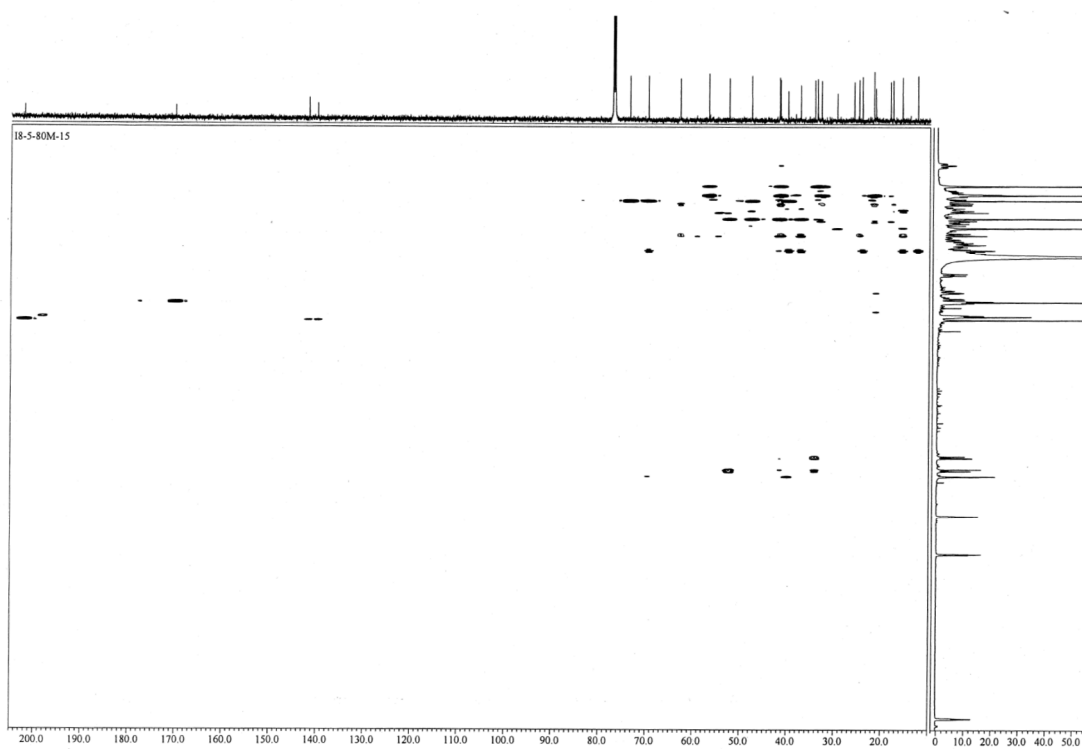

**Figure S54.** HMBC spectrum of compound **6** in  $\text{CDCl}_3$ .

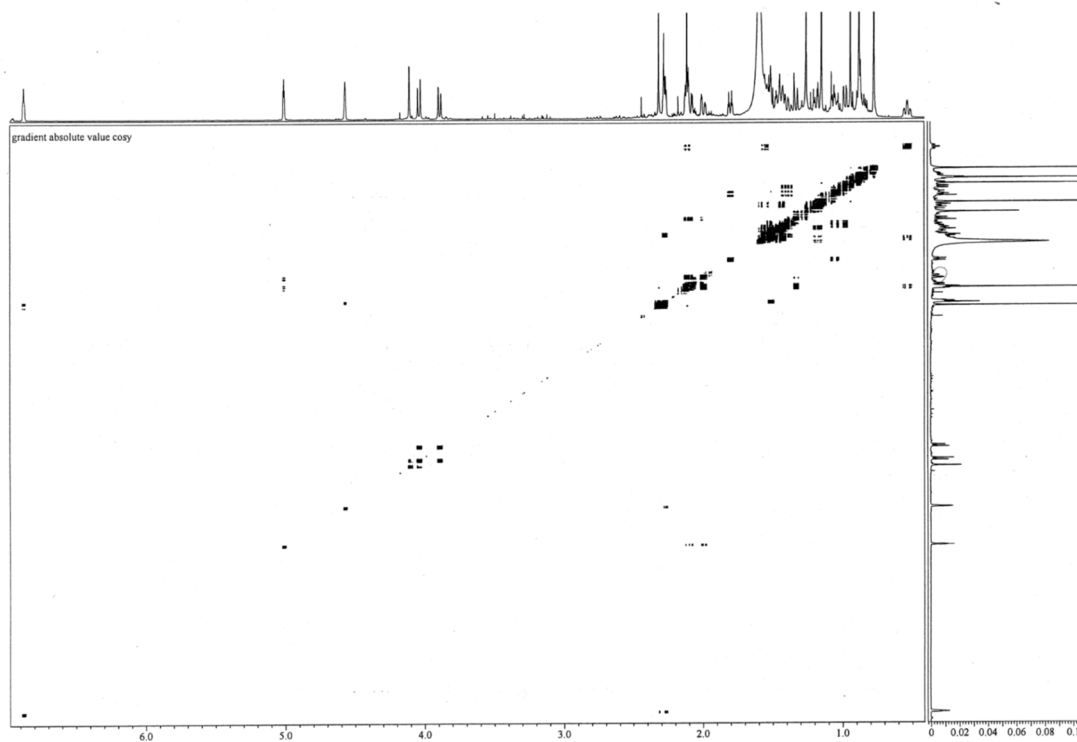

**Figure S55.**  $^1\text{H}$ - $^1\text{H}$  COSY spectrum of compound **6** in  $\text{CDCl}_3$ .

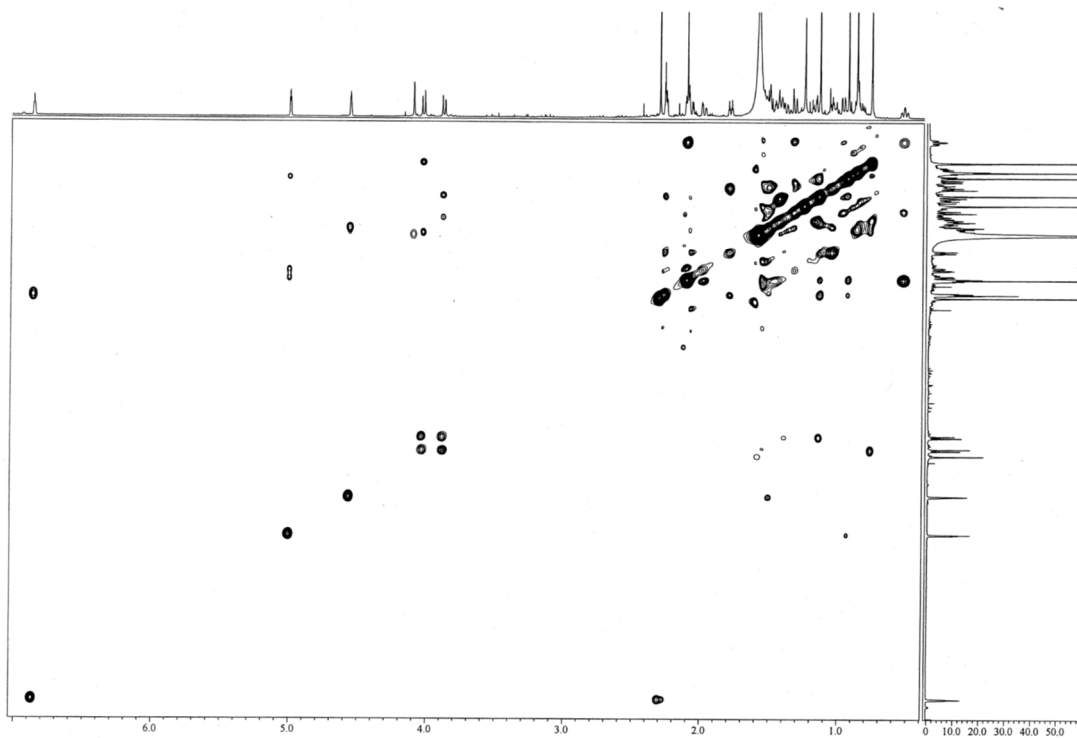

**Figure S56.** NOESY spectrum of compound **6** in  $\text{CDCl}_3$

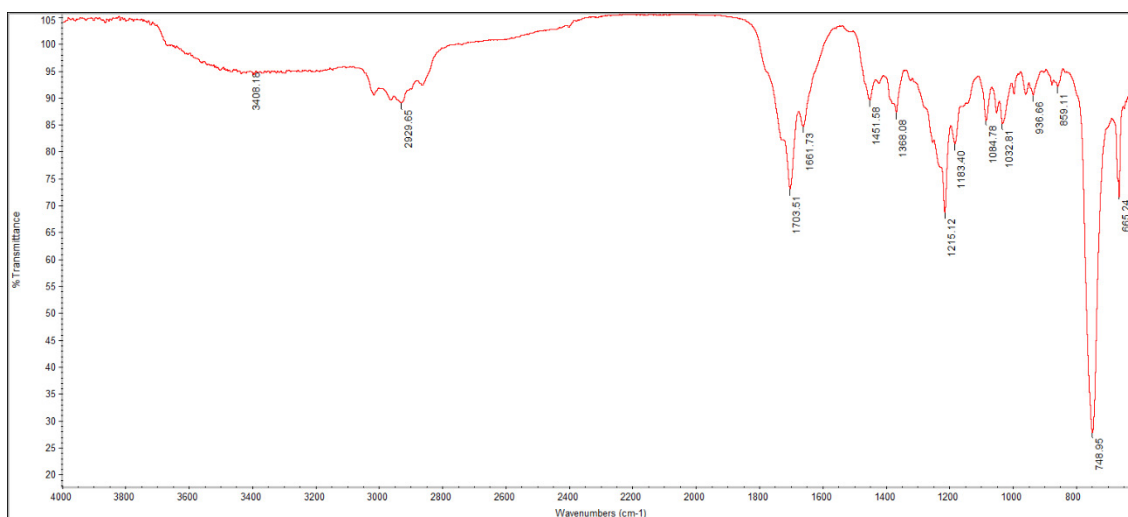

**Figure S57.** IR spectrum of compound 7.

### FT-MS

#### Analysis Info

Analysis Name D:\Data\2\1844\_000003.d  
 Method broadband first signal  
 Sample Name 18-4-4  
 Comment ESI Positive

10/29/2020 4:17:55 PM

Instrument: FT-MS solarix

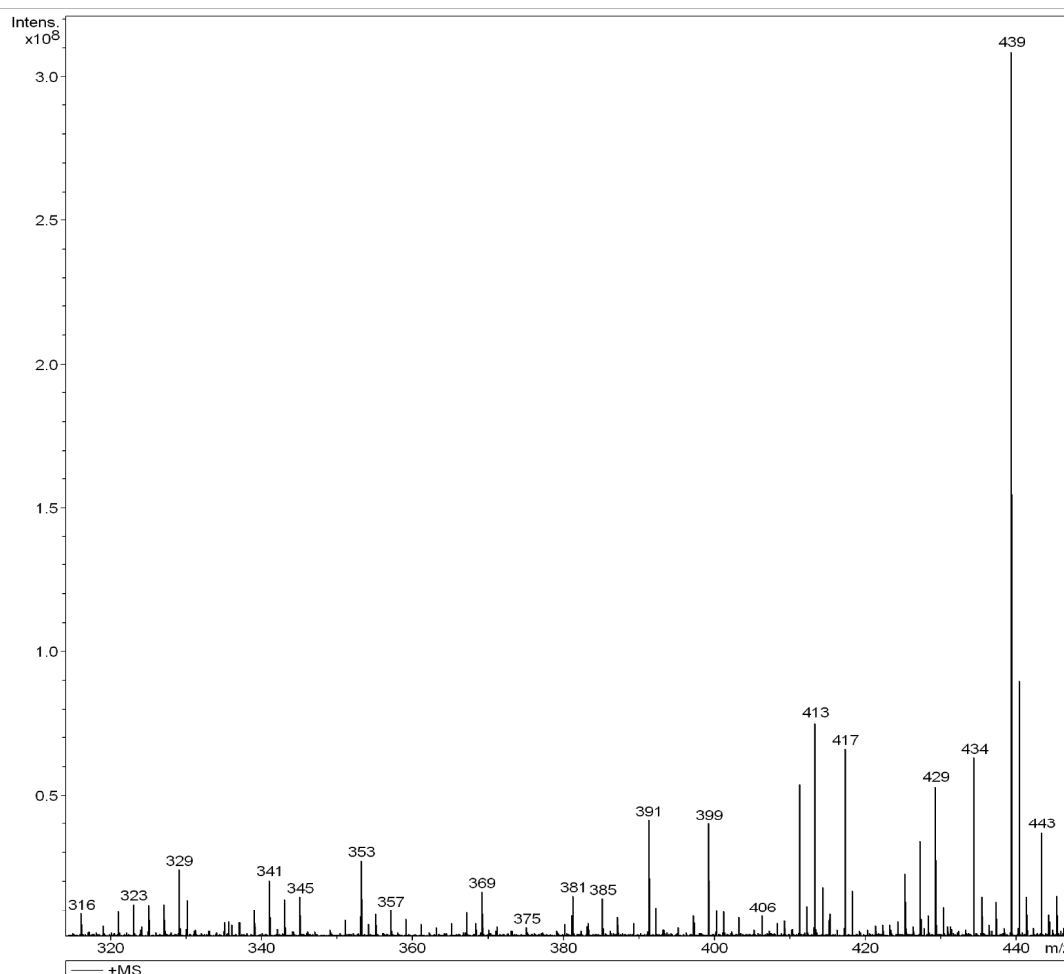

**Figure S58.** ESIMS spectrum of compound 7.

## Mass Spectrum SmartFormula Report

### Analysis Info

Analysis Name D:\Data\1844\_000002.d  
Method broadband first signal  
Sample Name 18-4-4  
Comment ESI Positive

10/29/2020 4:16:52 PM  
Operator: YU HSIAO-CHING  
Instrument: BRUKER FT-MS solariX

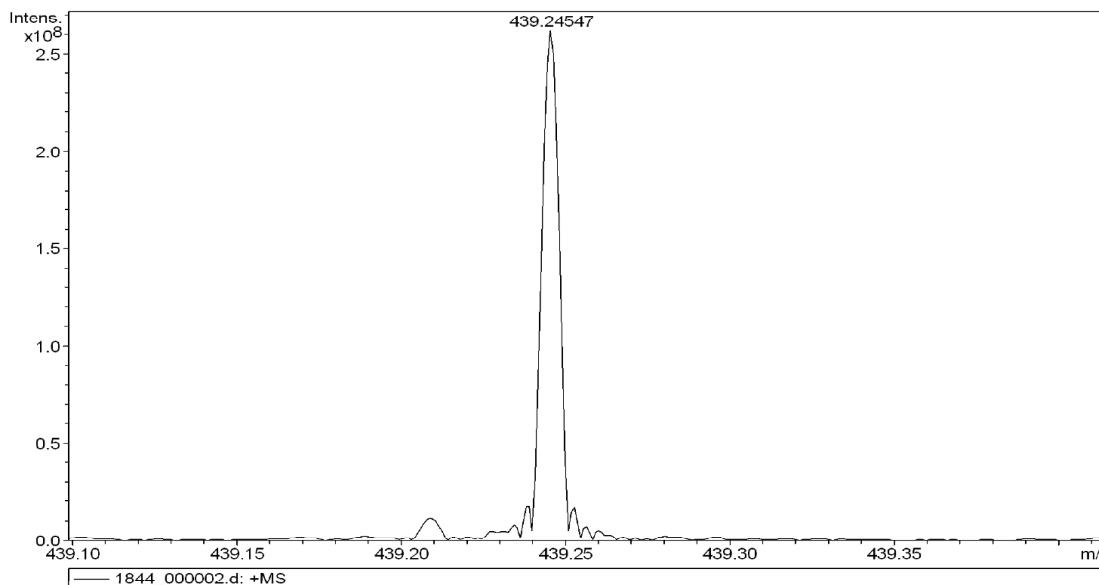

| Meas. m/z | # | Formula          | Score  | m/z       | err [mDa] | err [ppm] | mSigma | rdb | e <sup>-</sup> | Conf | N-Rule |
|-----------|---|------------------|--------|-----------|-----------|-----------|--------|-----|----------------|------|--------|
| 439.24547 | 1 | C 25 H 36 Na O 5 | 100.00 | 439.24550 | 0.03      | 0.07      | 4.9    | 7.5 | even           |      | ok     |

Figure S59. HRESIMS spectrum of compound 7.

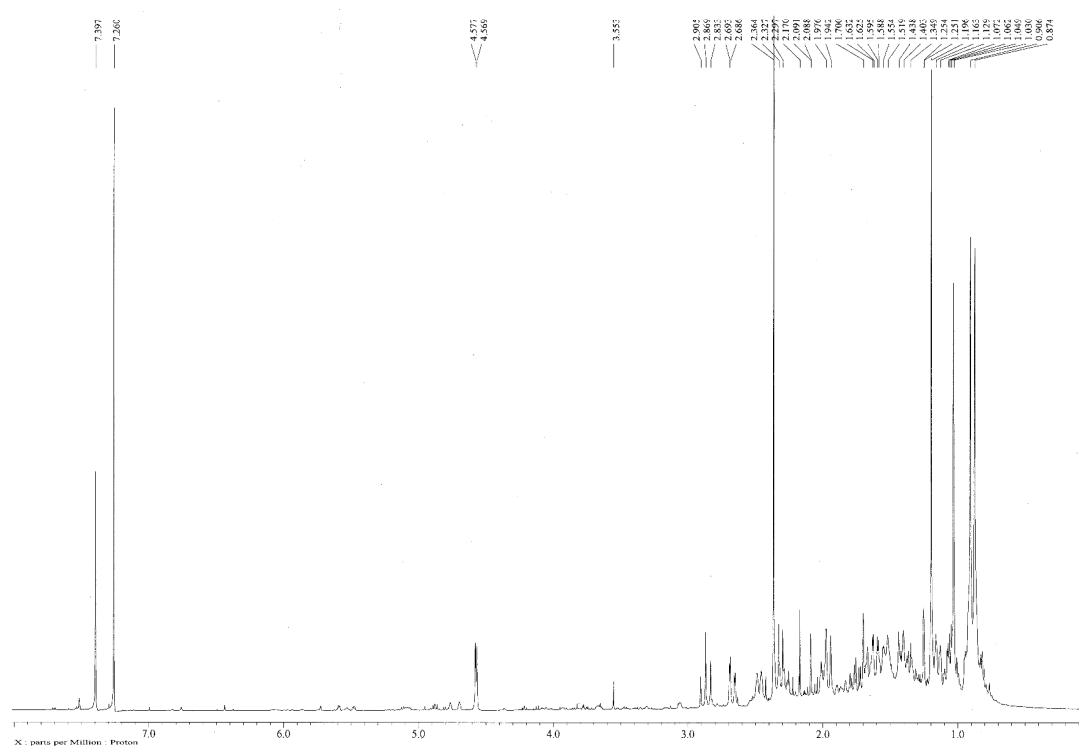

Figure S60. <sup>1</sup>H NMR spectrum (400 MHz) of compound 7 in CDCl<sub>3</sub>.

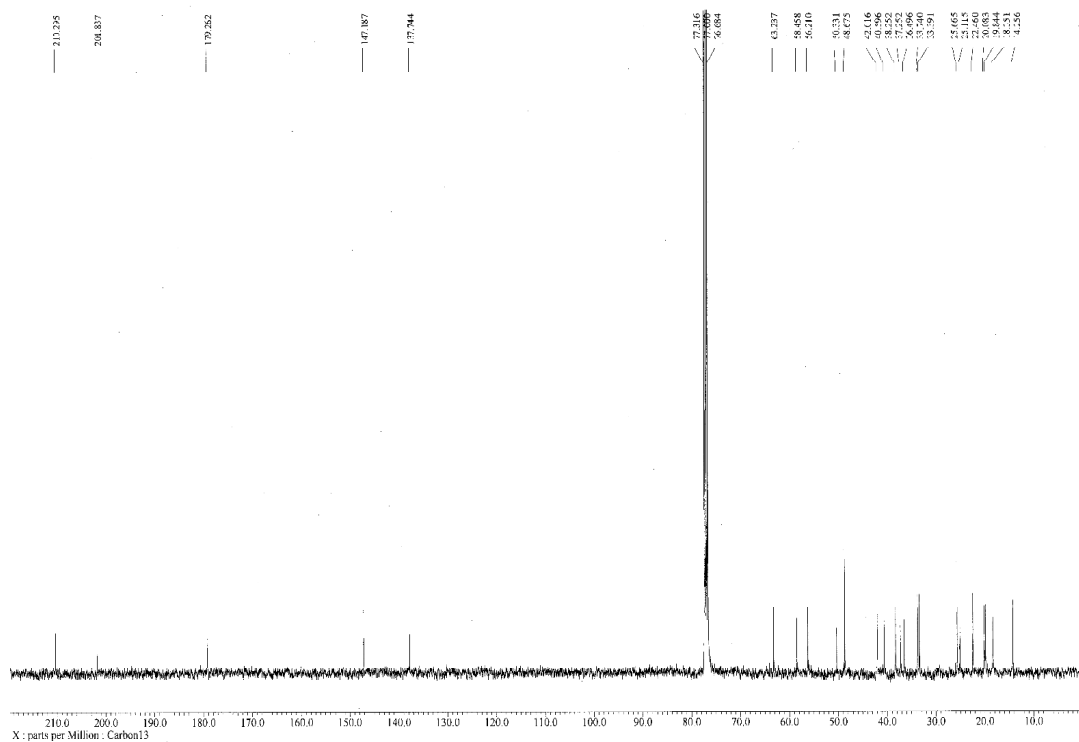

**Figure S61.**  $^{13}\text{C}$  NMR spectrum (100 MHz) of compound **7** in  $\text{CDCl}_3$ .

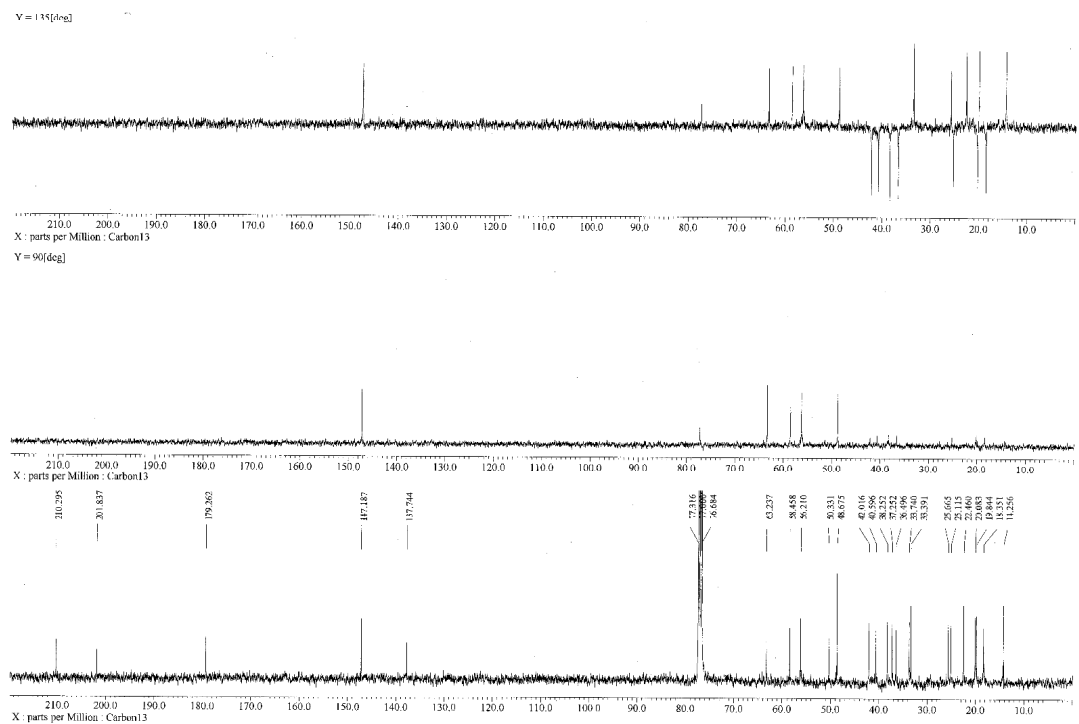

**Figure S62.** DEPT spectrum of compound **7** in  $\text{CDCl}_3$ .



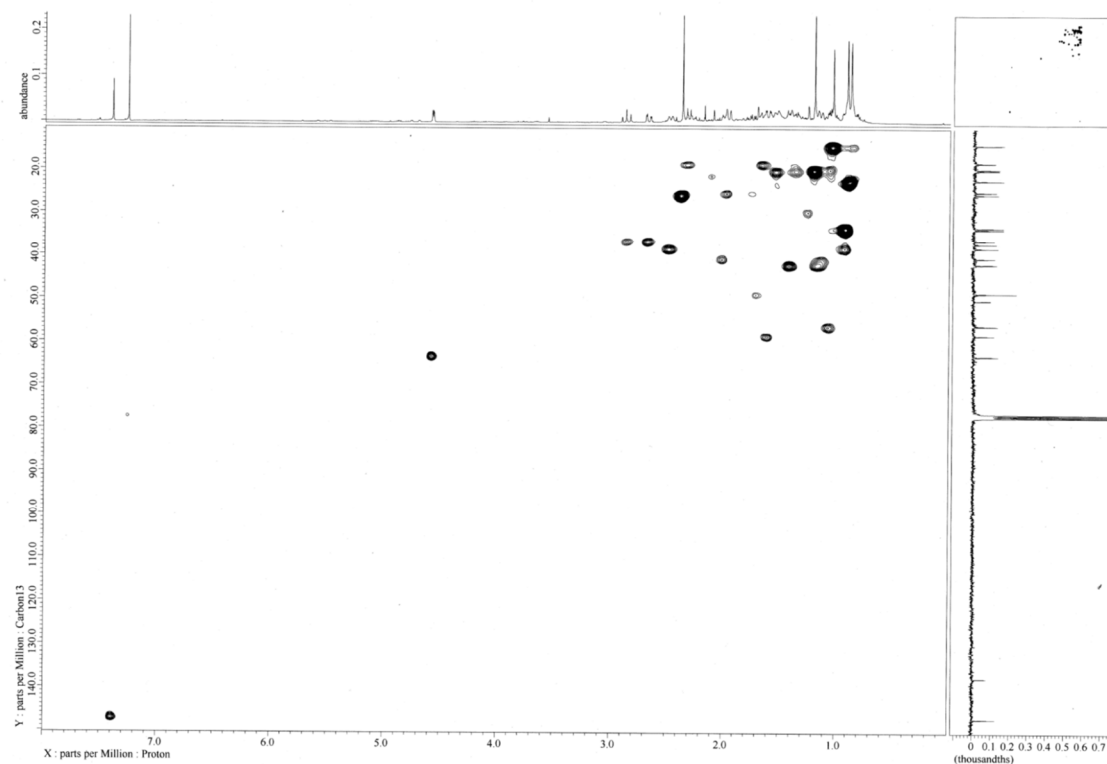

**Figure S63.** HSQC spectrum of compound **7** in  $\text{CDCl}_3$ .

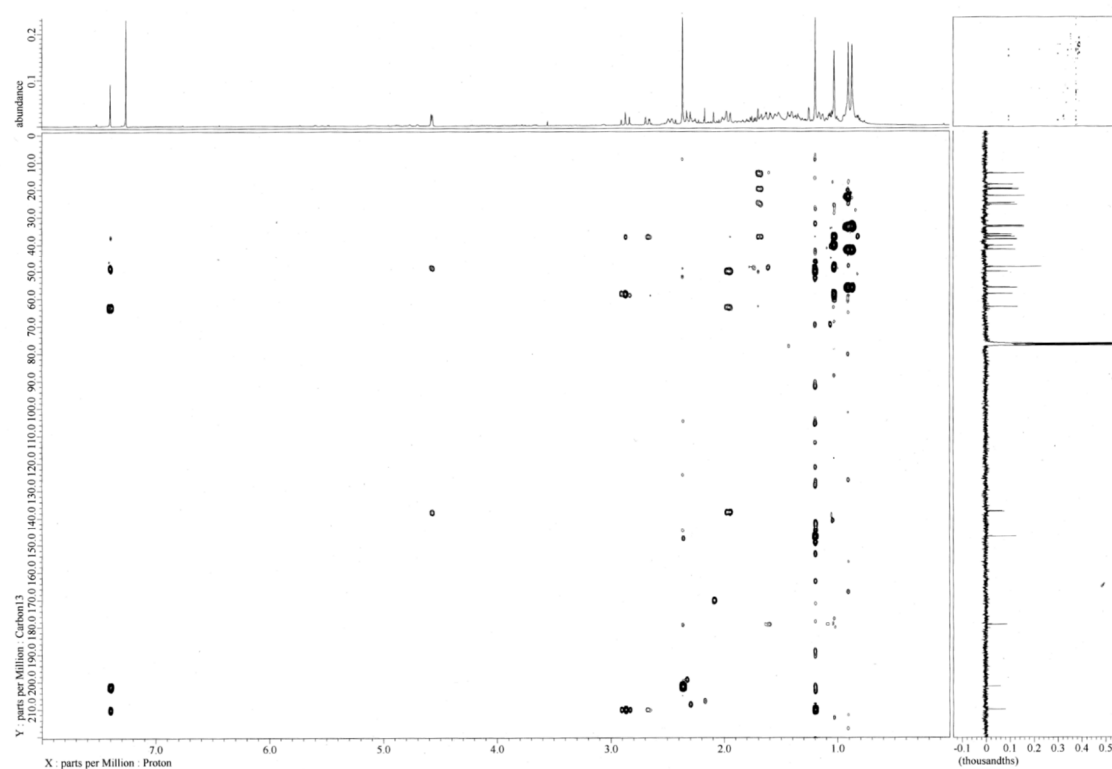

**Figure S64.** HMBC spectrum of compound **7** in  $\text{CDCl}_3$ .

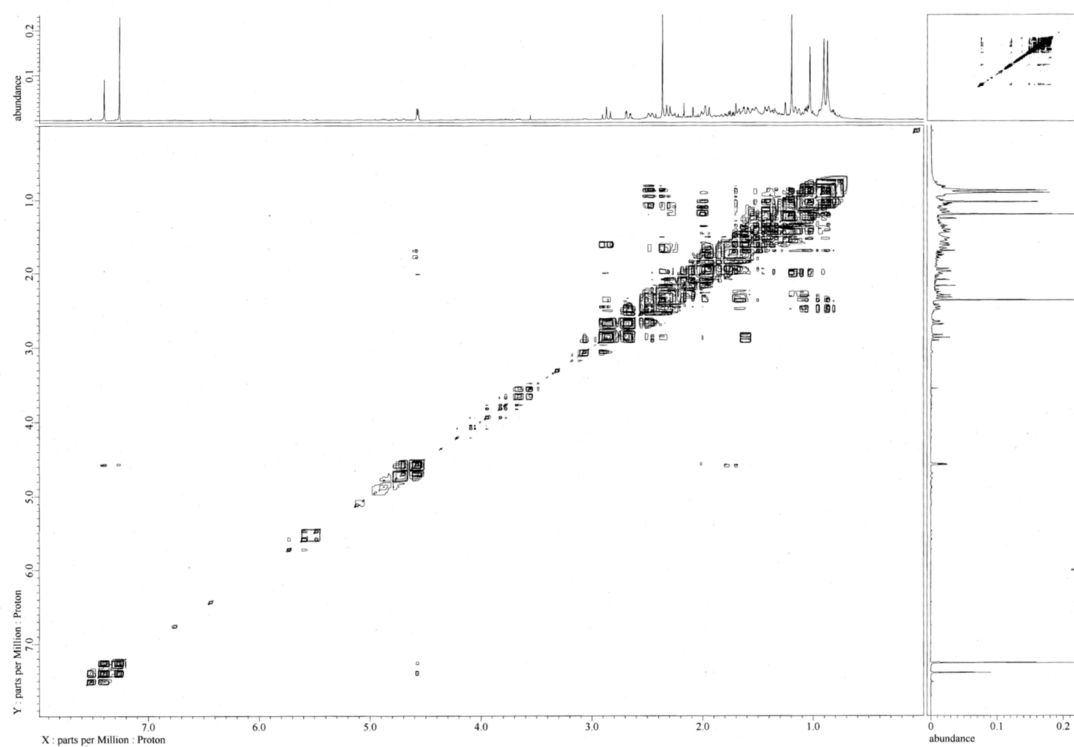

**Figure S65.**  $^1\text{H}$ - $^1\text{H}$  COSY spectrum of compound 7 in  $\text{CDCl}_3$ .

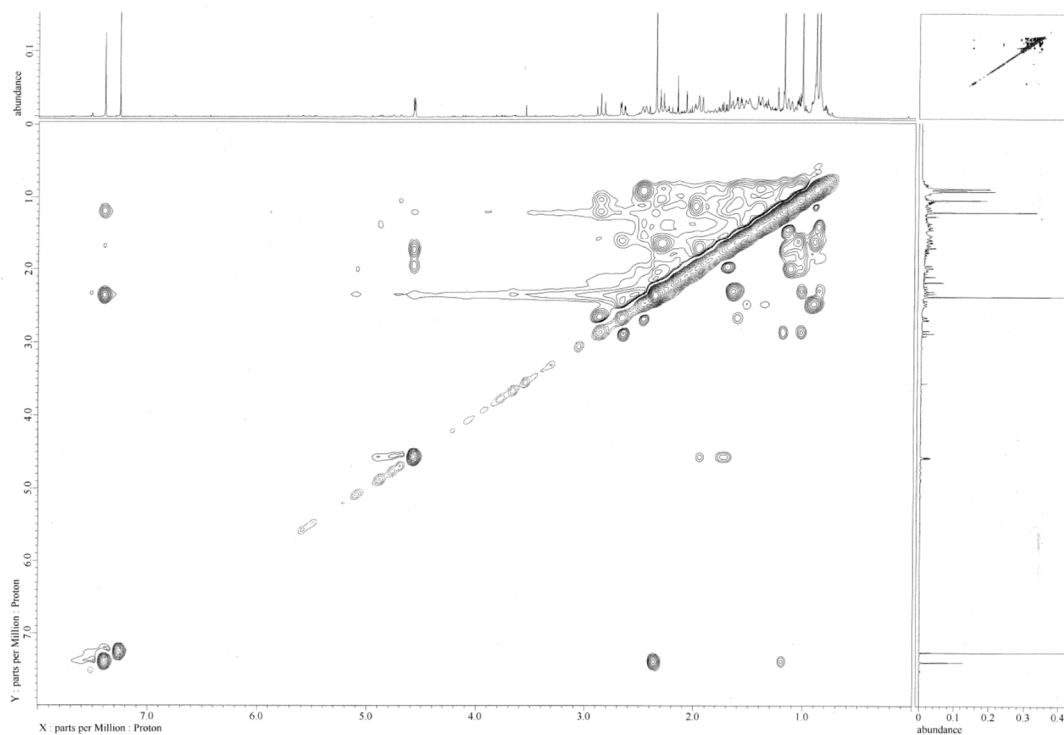

**Figure S66.** NOESY spectrum of compound 7 in  $\text{CDCl}_3$
